# Supplementary material for: A Multimodal Intervention for Prevention of Overweight and Obesity in Schoolchildren. A Protocol Study “PREVIENE-CÁDIZ”
Source: MDPI journal article supplement (doi:10.3390/ijerph18041622), 2021-02-08

# Como nos movemos y nos sentimos

¡Hola!

Desde la **Universidad de Cádiz** y la **Escuela Andaluza de Salud Pública** estamos estudiando la **alimentación de los niños y las niñas de tu edad en la provincia de Cádiz**. Te vamos a preguntar sobre la actividad física que haces y cómo te sientes.

No se trata de un examen, no hay respuestas buenas ni malas. Sólo tienes que dar tu opinión y contestar sobre lo que haces. Como **es anónimo**, nadie va a saber cuáles son tus respuestas.

## ¿Qué tienes que hacer?

- ✓ Lee atentamente cada pregunta y pregúntanos si no la entiendes bien.
- ✓ Responde la verdad, es importante.
- ✓ Si te equivocas puedes cambiar la respuesta. ¿Cómo? Táchala y marca la nueva.

Son 31 preguntas en esta encuesta.

¡Muchas gracias por participar!

**CÓDIGO:** Antes de empezar, **escribe el código que te han dado** para ésta encuesta. **Es el mismo que el utilizado en la encuesta de Alimentación.**

Por favor, escribe aquí: **Código:**

## Actividad física

*Te preguntamos sobre la actividad física que haces y algunos momentos de tu tiempo libre.*

**1. Ahora nos gustaría que nos contestaras.** Por favor, selecciona la respuesta apropiada para cada concepto:

|                              | Caminando             | En bicicleta          | En transporte público (bus) | En coche              | Otros                 |
|------------------------------|-----------------------|-----------------------|-----------------------------|-----------------------|-----------------------|
| ¿Cómo vas a la escuela?      | <input type="radio"/> | <input type="radio"/> | <input type="radio"/>       | <input type="radio"/> | <input type="radio"/> |
| ¿Cómo vuelves de la escuela? | <input type="radio"/> | <input type="radio"/> | <input type="radio"/>       | <input type="radio"/> | <input type="radio"/> |

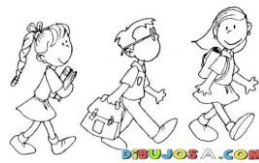

**2. ¿Qué haces durante el recreo?** Puedes elegir más de una respuesta.

- ☐ Estoy sentado/a (hablando, leyendo, jugando a muñecas, jugando videojuegos)
- ☐ Juego en los columpios u otros juegos de moverse que hay en el patio de la escuela
- ☐ Juego a pelota, correr, cuerda, bailar, etc.
- ☐ Juego fútbol, baloncesto, etc.
- ☐ Otro:

www.020gpa.com

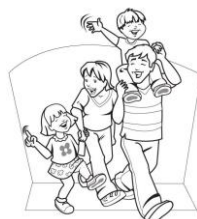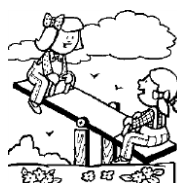



**8. ¿Qué zonas hay cerca de tu casa para poder ir a jugar?** *Puedes señalar más de una respuesta:*

- ☐ No hay ninguna  
☐ Parque con juegos infantiles (columpios, etc.)  
☐ Espacio amplio (plaza, parque, etc.) donde se puede ir en bicicleta, jugar a pelota, etc.  
☐ Pabellón deportivo  
☐ Otro:

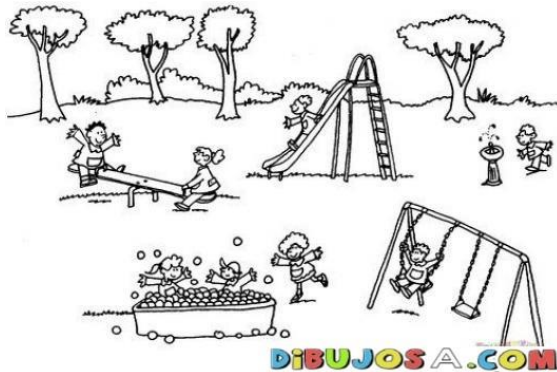

**9. ¿Haces deporte, corres en bicicleta, patinas, vas a la montaña, etc., con tu familia?** *Marca una respuesta.*

- ☐ Sí  
☐ No

**10. ¿Cuántos días de la semana haces deporte, montas en bicicleta, patinas, vas a la montaña, etc., con tu familia?**

*Por favor, selecciona sólo una:*

- ☐ 1 ☐ 2 ☐ 3 ☐ 4 ☐ 5 ☐ 6 ☐ 7

**11. ¿Juegas o practicas algún deporte con tus amigos durante el fin de semana?**

*Por favor, selecciona sólo una:*

- ☐ Todos los fines de semanas del mes  
☐ Dos o tres fines de semana al mes  
☐ Un fin de semana al mes  
☐ Nunca

**12. ¿Haces deporte o juegas con tu familia por las tardes durante la semana?**

*Por favor, selecciona sólo una de las siguientes opciones:*

- ☐ Todos los días de la semana  
☐ Dos o tres días a la semana  
☐ Un día a la semana  
☐ Nunca

**13. En nuestros barrios y pueblos hay recursos o actividades que nos dan bienestar y facilitan realizar actividad física.**

Indica un recurso de tu barrio o pueblo que facilite que realices actividad física.

## TV y Videojuegos

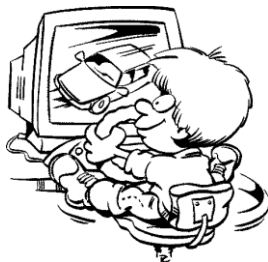

**14. De lunes a jueves, sumando todo el tiempo que dedicas a estas actividades ¿cuántas horas al día ves la televisión, DVD, Nintendo®, PlayStation®, Xbox®, GameBoy®, Nintendo DS®, etc.? Elige *una* respuesta.**

- ☐ Ninguna vez
- ☐ Menos de 2 horas al día
- ☐ Entre 2 a 4 horas al día
- ☐ Más de 4 horas al día

**15. De viernes a domingo y festivos, ¿cuántas horas al día ves la televisión, DVD, Nintendo®, PlayStation®, Xbox®, GameBoy®, Nintendo DS®, etc.? Elige *una* respuesta**

- ☐ Ninguna vez
- ☐ Menos de 2 horas al día
- ☐ Entre 2 a 4 horas al día
- ☐ Más de 4 horas al día

**16. De lunes a jueves, ¿cuántas horas al día pasas delante de un ordenador o móvil navegando por internet, chateando con amigos, etc., una vez terminadas las clases? Marca *una* respuesta:**

- ☐ Ninguna vez
- ☐ Menos de 2 horas al día
- ☐ Entre 2 a 4 horas al día
- ☐ Más de 4 horas al día

**17. De viernes a domingo y los festivos ¿cuántas horas al día pasas delante de un ordenador o móvil navegando por internet, chateando con amigos, etc., una vez terminadas las clases? Marca *una* respuesta:**

- ☐ Ninguna vez
- ☐ Menos de 2 horas al día
- ☐ Entre 2 a 4 horas al día
- ☐ Más de 4 horas al día

## ¿Cómo me siento?

Ahora te vamos a preguntar sobre ¿Cómo te sientes?

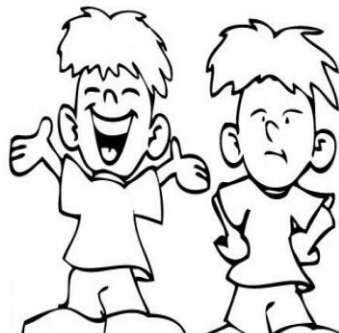

**18. Dirías que tu salud es... Elige *una* respuesta.**

- ☐ Muy buena
- ☐ Buena
- ☐ Regular
- ☐ Mala
- ☐ No lo sé

**19. En la última semana, ¿Te has sentido bien?**

Por favor, selecciona **sólo una** de las siguientes opciones:

- ☐ Nunca o casi nunca  
☐ Pocas veces (1 vez a la semana)  
☐ Algunas veces (2-3 veces a la semana)  
☐ Muchas veces (4-5 veces a la semana)  
☐ Siempre o casi siempre

**20. ¿Eres feliz?** Por favor, selecciona **sólo una** de las siguientes opciones:

- ☐ Si  
☐ No

**21. Durante la última semana, ¿Cuántas veces...**

Por favor, selecciona la respuesta apropiada para cada concepto:

|                                       | ¿Te ha costado respirar? | ¿Has sentido picor en la piel? |
|---------------------------------------|--------------------------|--------------------------------|
| Nunca o casi nunca                    | <input type="radio"/>    | <input type="radio"/>          |
| Pocas veces (1 vez a la semana)       | <input type="radio"/>    | <input type="radio"/>          |
| Algunas veces (2-3 veces a la semana) | <input type="radio"/>    | <input type="radio"/>          |
| Muchas veces (4-5 veces a la semana)  | <input type="radio"/>    | <input type="radio"/>          |
| Siempre o casi siempre                | <input type="radio"/>    | <input type="radio"/>          |

**22. Durante la última semana, ¿Cuántas veces...**

Por favor, selecciona la respuesta apropiada para cada concepto:

|                                       | ¿Has llorado mucho?   | ¿Has estado preocupado o preocupada? | ¿Has estado enfadado o enfadada? | ¿Has sentido miedo?   |
|---------------------------------------|-----------------------|--------------------------------------|----------------------------------|-----------------------|
| Nunca o casi nunca                    | <input type="radio"/> | <input type="radio"/>                | <input type="radio"/>            | <input type="radio"/> |
| Pocas veces (1 vez a la semana)       | <input type="radio"/> | <input type="radio"/>                | <input type="radio"/>            | <input type="radio"/> |
| Algunas veces (2-3 veces a la semana) | <input type="radio"/> | <input type="radio"/>                | <input type="radio"/>            | <input type="radio"/> |
| Muchas veces (4-5 veces a la semana)  | <input type="radio"/> | <input type="radio"/>                | <input type="radio"/>            | <input type="radio"/> |
| Siempre o casi siempre                | <input type="radio"/> | <input type="radio"/>                | <input type="radio"/>            | <input type="radio"/> |

**23. Durante la última semana, ¿Cuántas veces te has encontrado tan mal que no has tenido ganas de jugar en casa? Marca **una** respuesta:**

- ☐ Nunca o casi nunca  
☐ Pocas veces (1 vez a la semana)  
☐ Algunas veces (2-3 veces a la semana)  
☐ Muchas veces (4-5 veces a la semana)  
☐ Siempre o casi siempre

**24. Durante la última semana, ¿Cuántas veces te has sentido tan mal que no has podido salir de casa? Marca **una** respuesta:**

- ☐ Nunca o casi nunca  
☐ Pocas veces (1 vez a la semana)  
☐ Algunas veces (2-3 veces a la semana)  
☐ Muchas veces (4-5 veces a la semana)  
☐ Siempre o casi siempre

**25. ¿Estás contento o contenta con tu forma de ser? Por favor, marca sólo una respuesta:**

- ☐ Sí
- ☐ No

**26. En la última semana, ¿Cuántas veces te sentiste muy orgulloso de ti mismo/orgullosa de ti misma? Marca una respuesta:**

- ☐ Nunca o casi nunca
- ☐ Pocas veces (1 vez a la semana)
- ☐ Algunas veces (2-3 veces a la semana)
- ☐ Muchas veces (4-5 veces a la semana)
- ☐ Siempre o casi siempre

**27. En la última semana, ¿Cuántas veces sentiste que te querían? Marca una respuesta:**

- ☐ Nunca o casi nunca
- ☐ Pocas veces (1 vez a la semana)
- ☐ Algunas veces (2-3 veces a la semana)
- ☐ Muchas veces (4-5 veces a la semana)
- ☐ Siempre o casi siempre

**28. En la última semana, ¿Cuántas veces te lo pasaste muy bien? Marca una respuesta:**

- ☐ Nunca o casi nunca
- ☐ Pocas veces (1 vez a la semana)
- ☐ Algunas veces (2-3 veces a la semana)
- ☐ Muchas veces (4-5 veces a la semana)
- ☐ Siempre o casi siempre

**29. En la última semana, ¿Cuántas veces te viste muy guapo o guapa? Elige una respuesta**

- ☐ Nunca o casi nunca
- ☐ Pocas veces (1 vez a la semana)
- ☐ Algunas veces (2-3 veces a la semana)
- ☐ Muchas veces (4-5 veces a la semana)
- ☐ Siempre o casi siempre

**30. En la última semana, ¿Cuántas veces te sentiste sano o sana? Marca una respuesta:**

- ☐ Nunca o casi nunca
- ☐ Pocas veces (1 vez a la semana)
- ☐ Algunas veces (2-3 veces a la semana)
- ☐ Muchas veces (4-5 veces a la semana)
- ☐ Siempre o casi siempre

**31. Cuando quiero algo, estoy seguro o segura que lo conseguiré. Marca sólo una respuesta:**

- ☐ Siempre
- ☐ Frecuentemente
- ☐ Algunas veces
- ☐ Nunca
- ☐ No sé/No contesto

**¡Ya has terminado!**

**¡Gracias por completar esta encuesta!**

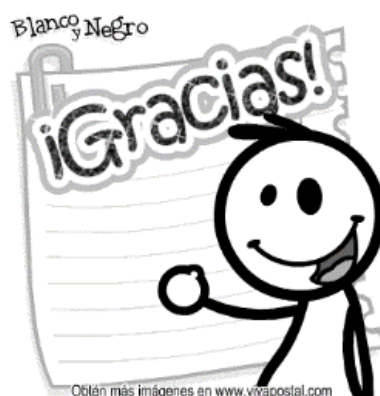

Supplement: s1 [file s1]
