# Supplementary material for: A Multimodal Intervention for Prevention of Overweight and Obesity in Schoolchildren. A Protocol Study “PREVIENE-CÁDIZ”
Source: MDPI journal article supplement (doi:10.3390/ijerph18041622), 2021-02-08
Supplement: s1 [file s1]

## Cuestionario de Evaluación del Programa **PREVIENE CÁDIZ**.

### Directores/as – Equipos directivos

Gracias por participar en este proyecto. Su opinión es muy importante.

Por favor cumplimente este formulario que nos permitirá evaluar el funcionamiento del Programa y mejorarlo con sus propuestas.

La duración prevista es de 5 minutos.

Hay 14 preguntas en la encuesta.

**Nombre del centro**

**Localidad**

**Persona que responde la encuesta:**

|                       |                          |                |
|-----------------------|--------------------------|----------------|
| Director/a del centro | <input type="checkbox"/> | Indicar quien: |
| Otra persona          | <input type="checkbox"/> |                |

### 1. ¿Considera interesante incluir en el Programa **PREVIENE CÁDIZ** alguna otra actividad relacionada con los contenidos abordados?

Por favor seleccione **sólo una** de las siguientes opciones:

☐ Sí

☐ No

**Descríbala brevemente.** (Sólo conteste esta pregunta si la respuesta fue “Sí” en la pregunta anterior).

Por favor, escriba su respuesta aquí:

### 2. Valore la implicación de las familias con el desarrollo del programa.

Valore con una escala del 1 al 5 la implicación de las familias en el programa, donde 1 significa que *no se han implicado nada* y 5 que *se han implicado mucho*.

Por favor seleccione **sólo una** de las siguientes opciones:

No se han implicado nada






Se han implicado mucho

### 3. ¿Cree que el profesorado necesita más recursos para llevar a cabo el programa PREVIENE-Cádiz en las áreas que se especifican a continuación?

Por favor, marque las opciones que correspondan:

- ☐ Formación
- ☐ Materiales
- ☐ Apoyo de profesionales externos/as
- ☐ Tiempo para desarrollar las sesiones
- ☐ Otro:

### 4. ¿Volvería a participar en este programa el próximo curso escolar?

Por favor, seleccione **sólo una** de las siguientes opciones:

- ☐ Sí
- ☐ No

### 5. ¿Recomendaría este programa a otros centros?

Por favor, seleccione **sólo una** de las siguientes opciones:

- ☐ Sí
- ☐ No

### 6. ¿Se han aplicado los recreos activos en su centro?

Por favor, seleccione **sólo una** de las siguientes opciones:

- ☐ Sí
- ☐ No

### 7. Señale el motivo principal por el que no se llevaron a cabo los recreos activos.

**Sólo conteste esta pregunta si la respuesta fue 'No' en la pregunta 25.** Por favor, seleccione **sólo una** de las siguientes opciones:

- ☐ No sabía cómo aplicar la propuesta de recreos activos.
- ☐ Creo que la propuesta de recreos activos no es eficaz.
- ☐ Considero que el alumnado ya es lo suficientemente activo durante los recreos.
- ☐ No estaba dispuesto/a a dedicar más tiempo al programa.
- ☐ Otro. Indíquelo:

### 8. ¿Podría aportar alguna sugerencia que, desde su punto de vista, contribuyera a mejorar el programa?

Por favor, escriba su respuesta aquí:

9. ¿Se ha desarrollado en su centro este año el programa “Creciendo en salud”? Sí ☐ No ☐ No lo sé ☐

10. En caso negativo ¿nos podría indicar cuales son las causas de no haberlo desarrollado?

11. En caso afirmativo, indicar qué líneas del mismo se han desarrollado: (en 3er curso)

|                                                                     |  |
|---------------------------------------------------------------------|--|
| Educación emocional.                                                |  |
| Estilos de vida Saludable.                                          |  |
| Autocuidados y Accidentalidad.                                      |  |
| Uso Positivo de las Tecnologías de la Información y la Comunicación |  |
| Prevención del Consumo de Sustancias Adictivas.                     |  |

12. En el caso de que se haya desarrollado alguna/s de las líneas anteriores, indicar qué bloques temáticos se han trabajado: (en 3er curso)

|                                                                     |  |
|---------------------------------------------------------------------|--|
| Educación emocional.                                                |  |
| - Conciencia Emocional.                                             |  |
| - Regulación Emocional.                                             |  |
| - Autonomía Emocional.                                              |  |
| - Competencia Social.                                               |  |
| - Competencias para la Vida y el Bienestar.                         |  |
| Estilos de vida Saludable.                                          |  |
| - Actividad Física.                                                 |  |
| - Alimentación Equilibrada.                                         |  |
| Autocuidados y Accidentalidad.                                      |  |
| - Autocuidados                                                      |  |
| - Accidentalidad:                                                   |  |
| o Educación Vial                                                    |  |
| o Seguridad en el Hogar                                             |  |
| Uso Positivo de las Tecnologías de la Información y la Comunicación |  |
| - Estilos de Vida Saludable en una Sociedad digital.                |  |
| - Adicciones a las TIC.                                             |  |
| - Buenas Prácticas y Recomendaciones.                               |  |
| Prevención del Consumo de Sustancias Adictivas.                     |  |
| - Hábitos que contribuyen a una vida sana.                          |  |
| - Consumo de Alcohol y Tabaco.                                      |  |
| - Publicidad y Drogas: mitos y creencias.                           |  |

13. ¿Disponéis en el Centro de un equipo de Promoción y Educación para la Salud? (Consejo de Salud Escolar o similar, grupo de personas encargados de estas actividades) Si ☐ No ☐

En caso afirmativo,

¿Quién lo ha coordinado? \_\_\_\_\_

¿Quién lo compone? (indicar las personas que lo componen, sus cargos y/o colectivos a los que representan, no es necesario indicar nombres y apellidos)

**14. Actividades realizadas este curso académico en el centro educativo con el alumnado de 3º curso, relacionadas con la alimentación y/o el ejercicio físico saludables, además de las incluidas en el programa PREVIENE.**

|                                                                                 |  |
|---------------------------------------------------------------------------------|--|
| Plan Escolar de Consumo de Frutas y Hortalizas (reparto de frutas / hortalizas) |  |
| Desayuno saludable.                                                             |  |
| Concurso de recetario infantil.                                                 |  |
| Huertos escolares.                                                              |  |
| Frutibus                                                                        |  |
| Otras:                                                                          |  |

**Indicar qué otras actividades se han realizado:**

**Muchas gracias por completar el cuestionario.**
