# Supplementary material for: A Multimodal Intervention for Prevention of Overweight and Obesity in Schoolchildren. A Protocol Study “PREVIENE-CÁDIZ”
Source: MDPI journal article supplement (doi:10.3390/ijerph18041622), 2021-02-08
Supplement: s1 [file s1]

**Por favor, lea con atención las siguientes preguntas y luego contéstelas:**

1. ¿Le dio usted Lactancia Materna a su hijo/a? (Si responde No, pase a la pregunta 4).
  - ☐ Si
  - ☐ No
2. ¿Cuánto tiempo le dio usted Lactancia materna? Ya sea sola o combinada.
  - ☐ Menos de un mes. Especifique por favor en días o semanas  
Días: \_\_\_\_\_  
Semanas: \_\_\_\_\_
  - ☐ Un mes
  - ☐ Dos meses
  - ☐ Tres meses
  - ☐ Cuatro meses
  - ☐ Cinco meses
  - ☐ Seis meses
  - ☐ Siete meses
  - ☐ Ocho meses
  - ☐ Nueve meses
  - ☐ Diez meses
  - ☐ Once meses
  - ☐ Un año
  - ☐ Más de un año: Para este caso especifique por favor: 1 año y \_\_\_\_\_ meses
  - ☐ Dos años
  - ☐ Más de dos años: Para este caso especifique por favor: 2 años y \_\_\_\_\_ meses
  - ☐ Tres años
  - ☐ Más de tres años: Para este caso especifique por favor: 3 años y \_\_\_\_\_ meses
  - ☐ Cuatro años
  - ☐ Más de cuatro años: Para este caso especifique por favor: 4 años y \_\_\_\_\_ meses
3. ¿Cuánto tiempo le dio usted SOLO lactancia materna? Es decir, indíquenos por favor cuanto tiempo (días, semanas o meses) que su hijo/a se alimentó solamente con leche materna.
4. ¿Cuándo introdujo usted por primera vez un alimento diferente a la leche (zumos, galletas, cereales...)?

|                                                   |                                                  |
|---------------------------------------------------|--------------------------------------------------|
| <input type="checkbox"/> Antes del primer mes     | <input type="checkbox"/> A partir del cuarto mes |
| <input type="checkbox"/> A partir del primer mes  | <input type="checkbox"/> A partir del quinto mes |
| <input type="checkbox"/> A partir del segundo mes | <input type="checkbox"/> A partir del sexto mes  |
| <input type="checkbox"/> A partir del tercer mes  | <input type="checkbox"/> No lo recuerdo          |
5. Su hijo/a nació
  - ☐ Por parto natural
  - ☐ Por cesárea
6. Indique por favor si lo recuerda, el peso de su hijo/a al nacer:
7. Su hijo/a nació:
  - ☐ A término (es decir, entre la semana 37 y 42)
  - ☐ Prematuramente (antes de la semana 37)

**¡¡MUCHAS GRACIAS POR SU PARTICIPACIÓN!!**
