# Supplementary material for: A Multimodal Intervention for Prevention of Overweight and Obesity in Schoolchildren. A Protocol Study “PREVIENE-CÁDIZ”
Source: MDPI journal article supplement (doi:10.3390/ijerph18041622), 2021-02-08
Supplement: s1 [file s1]

# Familias. Como comemos y nos movemos

¡Hola!

Desde la **Universidad de Cádiz y la Escuela Andaluza de Salud Pública** estamos estudiando los hábitos de alimentación, actividad física y horas de descanso de los niños, las niñas y sus familias en la provincia de Cádiz.

Para ello os pedimos vuestra colaboración. Se trata de un cuestionario para conocer estos hábitos. No le llevará más de 10/15 minutos y esta información es de una enorme importancia para nuestro estudio.

No se trata de un examen, no hay respuestas buenas ni malas. Sólo tiene que dar su opinión y contestar sobre lo que hace. Como es **anónimo**, nadie va a saber cuáles son sus respuestas.

## ¿Qué tiene que hacer?:

- Leer atentamente cada pregunta.
- Responder la verdad, es importante.
- Si se equivoca puede cambiar la respuesta. ¿Cómo? Táchela y marque la nueva.

¡Muchas gracias por participar!

Hay 55 preguntas en esta encuesta.

Antes de empezar, **por favor escriba** el código que se le ha facilitado:

**Código:**

## Quién realiza el cuestionario

**1. Por favor, indique quién realiza el cuestionario.** Por favor, seleccione **sólo una** de las siguientes opciones:

- ☐ Madre  
☐ Padre  
☐ Ambos  
☐ Otra persona:

## Alimentación adultos

**2. ¿Desayuna en las primeras horas de la mañana?** Marque una respuesta. Por favor, seleccione **sólo una** de las siguientes opciones:

- ☐ Nunca o casi nunca (menos de 1 vez a la semana)  
☐ Algunas veces (menos de 3 veces a la semana)  
☐ Muchas veces (de 3 a 5 veces a la semana)  
☐ Siempre o casi siempre (6 o 7 veces a la semana)

**3. Si desayuna entre semana (de lunes a viernes) en las primeras horas de la mañana ¿Dónde lo hace más frecuentemente?** Marque una respuesta. Por favor, seleccione **sólo una** de las siguientes opciones:

- ☐ En casa  
☐ En el trabajo  
☐ En una cafetería  
☐ Otro lugar. Diga cuál:

**4. ¿Toma el desayuno sentado/a? Marque una respuesta.** Por favor, seleccione **sólo una** de las siguientes opciones:

- ☐ Nunca o casi nunca (menos de 1 vez a la semana)
- ☐ Algunas veces (menos de 3 veces a la semana)
- ☐ Muchas veces (de 3 a 5 veces a la semana)
- ☐ Siempre o casi siempre (6 o 7 veces a la semana)

**5. Señale los alimentos que normalmente toma para desayunar (sin tener en cuenta los que tome a media mañana). Puede señalar más de una respuesta.** Por favor, marque las opciones que correspondan:

- ☐ Leche sola
- ☐ Leche con cacao, café, batidos
- ☐ Yogurt o yogurt líquido o Actimel ®
- ☐ Pan (bocadillo, tostada)
- ☐ Cereales de desayuno
- ☐ Pastas (galletas, croissants, ensaimadas, donuts ®, magdalenas, etc.)
- ☐ Pieza de fruta (manzana, pera, naranja, mandarinas, plátano, etc.)
- ☐ Zumo de fruta
- ☐ Refrescos (Coca-cola®, Pepsi®, Fanta ®, Seven up®, SunnyDeligth®, Nestea ®, etc.)
- ☐ Otros alimentos, diga cuáles:

**6. Señale lo que come frecuentemente a media mañana. Puede señalar más de una respuesta.** Por favor, marque las opciones que correspondan:

- ☐ Nada
- ☐ Leche sola
- ☐ Leche con cacao, café, batidos
- ☐ Yogurt o yogurt líquido o Actimel ®
- ☐ Pan (bocadillo, tostada)
- ☐ Cereales de desayuno
- ☐ Pastas (galletas, croissants, ensaimadas, donuts ®, magdalenas, etc.)
- ☐ Pieza de fruta (manzana, pera, naranja, mandarinas, plátano, etc. )
- ☐ Zumo de fruta
- ☐ Refrescos (Coca-cola®, Pepsi®, Fanta ®, Seven up®, SunnyDeligth®, Nestea ®, etc.)
- ☐ Otros alimentos, diga cuáles:

**7. ¿Qué bebe normalmente durante las comidas (almuerzo, cena etc.)? Puede señalar más de una respuesta.** Por favor, marque **las opciones que correspondan**:

- ☐ Nada
- ☐ Agua
- ☐ Zumos de fruta
- ☐ Refrescos (Coca-cola®, Pepsi®, Fanta ®, Seven up®, SunnyDeligth®, Nestea ®, etc.)
- ☐ Vino, cerveza etc.
- ☐ Otros. Cuales:

**8. A continuación le pedimos que nos conteste cual es la frecuencia con que consume los siguientes alimentos, señalando con una cruz en el espacio que corresponda:**

|                                                                           | Menos<br>de una<br>vez al<br>mes | 1 vez<br>al<br>mes    | 2-3<br>veces<br>al mes | 1 día a la<br>semana  | 2-4 días a<br>la<br>semana | 5-6 días<br>a la<br>semana | 1 vez<br>al día       | 2<br>veces<br>al día  | Más de<br>2 veces<br>al día |
|---------------------------------------------------------------------------|----------------------------------|-----------------------|------------------------|-----------------------|----------------------------|----------------------------|-----------------------|-----------------------|-----------------------------|
| Pan (pan de barra, pan tostado, bocadillos)                               | <input type="radio"/>            | <input type="radio"/> | <input type="radio"/>  | <input type="radio"/> | <input type="radio"/>      | <input type="radio"/>      | <input type="radio"/> | <input type="radio"/> | <input type="radio"/>       |
| Pan de molde                                                              | <input type="radio"/>            | <input type="radio"/> | <input type="radio"/>  | <input type="radio"/> | <input type="radio"/>      | <input type="radio"/>      | <input type="radio"/> | <input type="radio"/> | <input type="radio"/>       |
| Cereales de desayuno                                                      | <input type="radio"/>            | <input type="radio"/> | <input type="radio"/>  | <input type="radio"/> | <input type="radio"/>      | <input type="radio"/>      | <input type="radio"/> | <input type="radio"/> | <input type="radio"/>       |
| Patatas (todas menos las patatas de bolsa)                                | <input type="radio"/>            | <input type="radio"/> | <input type="radio"/>  | <input type="radio"/> | <input type="radio"/>      | <input type="radio"/>      | <input type="radio"/> | <input type="radio"/> | <input type="radio"/>       |
| Arroz, pasta (macarrones, espagueti, pasta en sopas, cuscús)              | <input type="radio"/>            | <input type="radio"/> | <input type="radio"/>  | <input type="radio"/> | <input type="radio"/>      | <input type="radio"/>      | <input type="radio"/> | <input type="radio"/> | <input type="radio"/>       |
| Verduras crudas o ensalada (lechuga, tomate, zanahoria, pimiento, etc.)   | <input type="radio"/>            | <input type="radio"/> | <input type="radio"/>  | <input type="radio"/> | <input type="radio"/>      | <input type="radio"/>      | <input type="radio"/> | <input type="radio"/> | <input type="radio"/>       |
| Verduras cocinadas (espinacas, berenjenas, calabacín, judía tierna, etc.) | <input type="radio"/>            | <input type="radio"/> | <input type="radio"/>  | <input type="radio"/> | <input type="radio"/>      | <input type="radio"/>      | <input type="radio"/> | <input type="radio"/> | <input type="radio"/>       |
| Fruta (manzana, pera, naranja, plátano, melón, papaya, dátiles, etc.)     | <input type="radio"/>            | <input type="radio"/> | <input type="radio"/>  | <input type="radio"/> | <input type="radio"/>      | <input type="radio"/>      | <input type="radio"/> | <input type="radio"/> | <input type="radio"/>       |
| Leche sola                                                                | <input type="radio"/>            | <input type="radio"/> | <input type="radio"/>  | <input type="radio"/> | <input type="radio"/>      | <input type="radio"/>      | <input type="radio"/> | <input type="radio"/> | <input type="radio"/>       |
| Leche con cacao, café, batidos                                            | <input type="radio"/>            | <input type="radio"/> | <input type="radio"/>  | <input type="radio"/> | <input type="radio"/>      | <input type="radio"/>      | <input type="radio"/> | <input type="radio"/> | <input type="radio"/>       |
| Yogur, yogur líquido, Actimel®                                            | <input type="radio"/>            | <input type="radio"/> | <input type="radio"/>  | <input type="radio"/> | <input type="radio"/>      | <input type="radio"/>      | <input type="radio"/> | <input type="radio"/> | <input type="radio"/>       |
| Queso                                                                     | <input type="radio"/>            | <input type="radio"/> | <input type="radio"/>  | <input type="radio"/> | <input type="radio"/>      | <input type="radio"/>      | <input type="radio"/> | <input type="radio"/> | <input type="radio"/>       |
| Legumbres (judías, lentejas, garbanzos, guisantes, habas, frijoles, etc.) | <input type="radio"/>            | <input type="radio"/> | <input type="radio"/>  | <input type="radio"/> | <input type="radio"/>      | <input type="radio"/>      | <input type="radio"/> | <input type="radio"/> | <input type="radio"/>       |
| Carne blanca (pollo, pavo, conejo)                                        | <input type="radio"/>            | <input type="radio"/> | <input type="radio"/>  | <input type="radio"/> | <input type="radio"/>      | <input type="radio"/>      | <input type="radio"/> | <input type="radio"/> | <input type="radio"/>       |
| Carne roja (hamburguesa, cerdo, ternera, cordero, etc.)                   | <input type="radio"/>            | <input type="radio"/> | <input type="radio"/>  | <input type="radio"/> | <input type="radio"/>      | <input type="radio"/>      | <input type="radio"/> | <input type="radio"/> | <input type="radio"/>       |
| Pescado (merluza, bacalao, dorada, salmón, atún, sardina, boquerones)     | <input type="radio"/>            | <input type="radio"/> | <input type="radio"/>  | <input type="radio"/> | <input type="radio"/>      | <input type="radio"/>      | <input type="radio"/> | <input type="radio"/> | <input type="radio"/>       |

[illegible]

## Alimentación hijos/as

Ahora le pedimos que conteste a unas preguntas sobre **lo que comen sus hijos/as**.

**9. ¿Su hijo/a desayuna antes de empezar las clases? (Tanto si desayuna en casa, como si lo hace en la escuela).** Por favor, seleccione **sólo una** de las siguientes opciones:

- ☐ Nunca o casi nunca (menos de 1 vez a la semana)
- ☐ Algunas veces (menos de 3 veces a la semana)
- ☐ Muchas veces (de 3 a 5 veces a la semana)
- ☐ Siempre o casi siempre (6 o 7 veces a la semana)

**10. ¿Su hijo o hija toma el desayuno sentado/a y en la mesa antes de empezar las clases?** Por favor, seleccione **sólo una** de las siguientes opciones:

- ☐ Nunca o casi nunca (menos de 1 vez a la semana)
- ☐ Algunas veces (menos de 3 veces a la semana)
- ☐ Muchas veces (de 3 a 5 veces a la semana)
- ☐ Siempre o casi siempre (6 o 7 veces a la semana)

**11. Señale los alimentos que él o ella normalmente come para desayunar.** Puede señalar más de una respuesta. Por favor, marque **las opciones que correspondan**:

- ☐ Leche sola
- ☐ Leche con cacao, café, batidos
- ☐ Yogur o yogur líquido o Actimel®
- ☐ Pan (bocadillo, tostada)
- ☐ Cereales de desayuno
- ☐ Pastas (galletas, croissants, ensaimadas, donuts®, magdalenas, etc.)
- ☐ Pieza de fruta (manzana, pera, naranja, mandarinas, plátano, etc.)
- ☐ Zumo de fruta
- ☐ Pan de molde
- ☐ Refrescos (Coca-cola®, Pepsi®, Fanta®, Seven up®, SunnyDeligth®, Nestea®, etc.)
- ☐ Otros alimentos, diga cuáles:

**12. Señale lo que él o ella come a media mañana.** Puede señalar más de una respuesta. Por favor, marque **las opciones que correspondan**:

- ☐ Nada
- ☐ Leche sola
- ☐ Leche con cacao, café, batidos
- ☐ Yogur o yogur líquido o Actimel®
- ☐ Pan (bocadillo, tostada)
- ☐ Pan de molde
- ☐ Cereales de desayuno
- ☐ Bollería (galletas, croissants, ensaimadas, donuts®, magdalenas, etc.)
- ☐ Pieza de fruta (manzana, pera, naranja, mandarinas, plátano, etc.)
- ☐ Zumo de fruta
- ☐ Refrescos (Coca-cola®, Pepsi®, Fanta®, Seven up®, SunnyDeligth®, Nestea®, etc.)
- ☐ Otros alimentos, diga cuáles:

**13. ¿Qué bebe su hijo o hija normalmente durante las comidas (almuerzo, cena etc.)?** *Puede señalar más de una respuesta. Por favor, marque las opciones que correspondan:*

- ☐ Nada
- ☐ Agua
- ☐ Zumos de fruta
- ☐ Refrescos (Coca-cola®, Pepsi®, Fanta ®, Seven up®, SunnyDeligth®, Nestea ®, etc.)
- ☐ Otros. Cuales: \_\_\_\_\_

|  |
|--|
|  |
|--|

**14. A continuación le pedimos que nos conteste cual es la frecuencia con que su hijo o hija consume los siguientes alimentos:**

[illegible]

|                                                                                                         | Menos<br>de una<br>vez al<br>mes | 1 vez al<br>mes       | 2-3<br>veces<br>al mes | 1 día a<br>la<br>semana | 2-4 días<br>a la<br>semana | 5-6 días<br>a la<br>semana | 1 vez al<br>día       | 2 veces<br>al día     | Más de<br>2 veces<br>al día |
|---------------------------------------------------------------------------------------------------------|----------------------------------|-----------------------|------------------------|-------------------------|----------------------------|----------------------------|-----------------------|-----------------------|-----------------------------|
| <b>Carne roja<br/>(hamburguesa, cerdo,<br/>ternera, cordero, etc.)</b>                                  | <input type="radio"/>            | <input type="radio"/> | <input type="radio"/>  | <input type="radio"/>   | <input type="radio"/>      | <input type="radio"/>      | <input type="radio"/> | <input type="radio"/> | <input type="radio"/>       |
| <b>Pescado (merluza,<br/>bacalao, dorada,<br/>salmón, atún,<br/>sardina, boquerones)</b>                | <input type="radio"/>            | <input type="radio"/> | <input type="radio"/>  | <input type="radio"/>   | <input type="radio"/>      | <input type="radio"/>      | <input type="radio"/> | <input type="radio"/> | <input type="radio"/>       |
| <b>Huevos (tortilla,<br/>huevo frito, huevo<br/>hervido, etc.)</b>                                      | <input type="radio"/>            | <input type="radio"/> | <input type="radio"/>  | <input type="radio"/>   | <input type="radio"/>      | <input type="radio"/>      | <input type="radio"/> | <input type="radio"/> | <input type="radio"/>       |
| <b>Frutos secos<br/>(almendras,<br/>avellanas, nueces,<br/>etc.)</b>                                    | <input type="radio"/>            | <input type="radio"/> | <input type="radio"/>  | <input type="radio"/>   | <input type="radio"/>      | <input type="radio"/>      | <input type="radio"/> | <input type="radio"/> | <input type="radio"/>       |
| <b>Postres lácteos (flan,<br/>natillas, crema<br/>catalana, helados,<br/>etc.)</b>                      | <input type="radio"/>            | <input type="radio"/> | <input type="radio"/>  | <input type="radio"/>   | <input type="radio"/>      | <input type="radio"/>      | <input type="radio"/> | <input type="radio"/> | <input type="radio"/>       |
| <b>Bollería (galletas,<br/>croissants, donuts®,<br/>magdalenas)</b>                                     | <input type="radio"/>            | <input type="radio"/> | <input type="radio"/>  | <input type="radio"/>   | <input type="radio"/>      | <input type="radio"/>      | <input type="radio"/> | <input type="radio"/> | <input type="radio"/>       |
| <b>Chucherías<br/>(caramelos, chicles,<br/>chocolate, etc.)</b>                                         | <input type="radio"/>            | <input type="radio"/> | <input type="radio"/>  | <input type="radio"/>   | <input type="radio"/>      | <input type="radio"/>      | <input type="radio"/> | <input type="radio"/> | <input type="radio"/>       |
| <b>Patatas de bolsa,<br/>ganchitos, palomitas<br/>de bolsa, Bocabits®,<br/>Doritos®</b>                 | <input type="radio"/>            | <input type="radio"/> | <input type="radio"/>  | <input type="radio"/>   | <input type="radio"/>      | <input type="radio"/>      | <input type="radio"/> | <input type="radio"/> | <input type="radio"/>       |
| <b>Embutidos (jamón<br/>serrano, butifarra,<br/>salami, mortadela,<br/>beicon, etc.)</b>                | <input type="radio"/>            | <input type="radio"/> | <input type="radio"/>  | <input type="radio"/>   | <input type="radio"/>      | <input type="radio"/>      | <input type="radio"/> | <input type="radio"/> | <input type="radio"/>       |
| <b>Zumo de fruta</b>                                                                                    | <input type="radio"/>            | <input type="radio"/> | <input type="radio"/>  | <input type="radio"/>   | <input type="radio"/>      | <input type="radio"/>      | <input type="radio"/> | <input type="radio"/> | <input type="radio"/>       |
| <b>Agua</b>                                                                                             | <input type="radio"/>            | <input type="radio"/> | <input type="radio"/>  | <input type="radio"/>   | <input type="radio"/>      | <input type="radio"/>      | <input type="radio"/> | <input type="radio"/> | <input type="radio"/>       |
| <b>Refrescos (Coca-cola<br/>®, Pepsi®, Fanta®,<br/>Seven up®,<br/>SunnyDelight®,<br/>Nestea®, etc.)</b> | <input type="radio"/>            | <input type="radio"/> | <input type="radio"/>  | <input type="radio"/>   | <input type="radio"/>      | <input type="radio"/>      | <input type="radio"/> | <input type="radio"/> | <input type="radio"/>       |
| <b>Vino, cerveza</b>                                                                                    | <input type="radio"/>            | <input type="radio"/> | <input type="radio"/>  | <input type="radio"/>   | <input type="radio"/>      | <input type="radio"/>      | <input type="radio"/> | <input type="radio"/> | <input type="radio"/>       |
| <b>Whisky, ginebra,<br/>vodka, ron, etc.</b>                                                            | <input type="radio"/>            | <input type="radio"/> | <input type="radio"/>  | <input type="radio"/>   | <input type="radio"/>      | <input type="radio"/>      | <input type="radio"/> | <input type="radio"/> | <input type="radio"/>       |

## Hábitos familiares

En las siguientes cuestiones le preguntamos sobre la forma de cocinar en casa, y como se suelen hacer las comidas.

**15. ¿Utilizan aceite de oliva en casa, como principal grasa?** Por favor, seleccione **sólo una** de las siguientes opciones:

- ☐ Sí  
☐ No

**16. Normalmente ¿Su hijo o hija mira la televisión o está delante de alguna pantalla (ordenador, móvil, Nintendo®, PlayStation®, Xbox®, Gameboy®, etc.) durante las comidas?** Por favor, seleccione **sólo una** de las siguientes opciones:

- ☐ Nunca o casi nunca (menos de 1 vez a la semana)  
☐ Algunas veces (menos de 3 veces a la semana)  
☐ Muchas veces (de 3 a 5 veces a la semana)  
☐ Siempre o casi siempre (6 o 7 veces a la semana)

**17. ¿Con qué frecuencia su hijo o hija va a un establecimiento de comida rápida? (McDonalds®, Burger King®, Kentucky®, Telepizza®, Doner Kebab, Frankfrut, etc.).** Por favor, seleccione **sólo una** de las siguientes opciones:

- ☐ Nunca o casi nunca (hasta una vez al mes)  
☐ Algunas veces (de 2 a 3 veces al mes a 1 día a la semana)  
☐ Muchas veces (de 2 a 4 días a la semana)  
☐ Siempre o casi siempre (más de 4 días a la semana)

**18. ¿Con qué frecuencia su hijo o hija va a comer en un restaurante? No tenga en cuenta los establecimientos de comida rápida.** Por favor, seleccione **sólo una** de las siguientes opciones:

- ☐ Nunca o casi nunca (hasta una vez al mes)  
☐ Algunas veces (de 2 a 3 veces al mes a 1 día a la semana)  
☐ Muchas veces (de 2 a 4 días a la semana)  
☐ Siempre o casi siempre (más de 4 días a la semana)

**19. ¿Dónde acostumbran a hacer la compra de alimentos preferentemente?** Por favor, seleccione la respuesta apropiada para cada concepto:

|                                                  | Productos frescos     | Productos NO Perecederos |
|--------------------------------------------------|-----------------------|--------------------------|
| Grandes Superficies (Carrefour®, Alcampo®, etc.) | <input type="radio"/> | <input type="radio"/>    |
| Supermercado (Mercadona®, Caprabo®, etc.)        | <input type="radio"/> | <input type="radio"/>    |
| Mercado                                          | <input type="radio"/> | <input type="radio"/>    |
| Pequeño comercio (tiendas del barrio)            | <input type="radio"/> | <input type="radio"/>    |
| Otros                                            | <input type="radio"/> | <input type="radio"/>    |



## Conocimientos sobre los alimentos

Conteste a las siguientes preguntas **según lo que usted cree o piensa**, independientemente de que lo haga o no:

**20. De todos estos grupos de alimentos, ¿De qué grupo considera que su hijo o hija debería comer el MAYOR número de raciones cada día?** Por favor, seleccione **sólo una** de las siguientes opciones:

- ☐ Pan, arroz, pasta
- ☐ Productos lácteos (leche, queso, yogurt)
- ☐ Bollería (galletas, croissants, etc.), golosinas
- ☐ Fruta
- ☐ Carne
- ☐ Pescado
- ☐ Huevos
- ☐ Frutos secos
- ☐ Verduras y hortalizas
- ☐ No lo sé

**21. De todos estos grupos de alimentos, ¿De qué grupo considera que su hijo o hija debería comer el MENOR número de raciones cada día?** Por favor, seleccione **sólo una** de las siguientes opciones:

- ☐ Pan, arroz, pasta
- ☐ Productos lácteos (leche, queso, yogurt)
- ☐ Bollería (galletas, croissants, etc.), golosinas
- ☐ Fruta
- ☐ Carne
- ☐ Pescado
- ☐ Huevos
- ☐ Frutos secos
- ☐ Verduras y hortalizas
- ☐ No lo sé

**22. ¿Cuántas raciones en total de frutas, verduras y hortalizas debería comer su hijo o hija CADA DÍA?** Por favor, seleccione **sólo una** de las siguientes opciones:

- ☐ 2 raciones
- ☐ 3 raciones
- ☐ 4 raciones
- ☐ 5 raciones como mínimo
- ☐ No lo sé

**23. En nuestros barrios y pueblos hay recursos o actividades que nos dan bienestar y facilitan mantener una alimentación saludable.**

Indique **un recurso de su barrio o pueblo** que facilite mantener una alimentación saludable para su familia.

**24. Ahora le pedimos que conteste sobre lo que piensa acerca de la alimentación de SU HIJO O HIJA. ¿Hasta qué punto está de acuerdo con éstas afirmaciones?**

|                                                                                                                   | Totalmente en desacuerdo | Bastante en desacuerdo | Ni de acuerdo ni en desacuerdo | Bastante de acuerdo   | Totalmente de acuerdo |
|-------------------------------------------------------------------------------------------------------------------|--------------------------|------------------------|--------------------------------|-----------------------|-----------------------|
| Algunos alimentos deben estar fuera del alcance de los niños y niñas                                              | <input type="radio"/>    | <input type="radio"/>  | <input type="radio"/>          | <input type="radio"/> | <input type="radio"/> |
| Los niños y niñas deben comer muchos dulces (golosinas, caramelos, helados, pasteles o bollería)                  | <input type="radio"/>    | <input type="radio"/>  | <input type="radio"/>          | <input type="radio"/> | <input type="radio"/> |
| Los padres y madres deben estar atentos a que sus hijos o hijas estén por encima del peso que les correspondería  | <input type="radio"/>    | <input type="radio"/>  | <input type="radio"/>          | <input type="radio"/> | <input type="radio"/> |
| Es importante que los niños y niñas coman los alimentos que les gustan cuando lo quieran                          | <input type="radio"/>    | <input type="radio"/>  | <input type="radio"/>          | <input type="radio"/> | <input type="radio"/> |
| Los niños y niñas deben comer muchos alimentos como bollería, chuchería, patatas de bolsa, embutidos, etc.        | <input type="radio"/>    | <input type="radio"/>  | <input type="radio"/>          | <input type="radio"/> | <input type="radio"/> |
| Los padres y madres deben preocuparse si su hijo o hija tiene que hacer dieta para mantenerse en un peso deseable | <input type="radio"/>    | <input type="radio"/>  | <input type="radio"/>          | <input type="radio"/> | <input type="radio"/> |
| Los zumos comerciales son saludables para sus hijos                                                               | <input type="radio"/>    | <input type="radio"/>  | <input type="radio"/>          | <input type="radio"/> | <input type="radio"/> |
| Cuando los niños y niñas se portan bien, deben recompensarse con helados, bollería, caramelos, etc.               | <input type="radio"/>    | <input type="radio"/>  | <input type="radio"/>          | <input type="radio"/> | <input type="radio"/> |
| Los niños y niñas deben de terminarse la comida que tienen en el plato                                            | <input type="radio"/>    | <input type="radio"/>  | <input type="radio"/>          | <input type="radio"/> | <input type="radio"/> |
| Si no presto atención, mi hijo o hija come mucho de sus alimentos preferidos                                      | <input type="radio"/>    | <input type="radio"/>  | <input type="radio"/>          | <input type="radio"/> | <input type="radio"/> |
| Si no presto atención mi hijo o hija come mucho más de lo que debería                                             | <input type="radio"/>    | <input type="radio"/>  | <input type="radio"/>          | <input type="radio"/> | <input type="radio"/> |
| Cuando puedo, ofrezco a mi hijo o hija sus alimentos preferidos como recompensa por haberse portado bien conmigo  | <input type="radio"/>    | <input type="radio"/>  | <input type="radio"/>          | <input type="radio"/> | <input type="radio"/> |
| He de estar especialmente pendiente para asegurarme de que mi hijo o hija come lo suficiente                      | <input type="radio"/>    | <input type="radio"/>  | <input type="radio"/>          | <input type="radio"/> | <input type="radio"/> |
| Si mi hijo o hija dice: “No tengo hambre”, igualmente intento que coma                                            | <input type="radio"/>    | <input type="radio"/>  | <input type="radio"/>          | <input type="radio"/> | <input type="radio"/> |
| Creo que mi hijo o hija come adecuadamente                                                                        | <input type="radio"/>    | <input type="radio"/>  | <input type="radio"/>          | <input type="radio"/> | <input type="radio"/> |

## Actividad física

A continuación, le pedimos que conteste a unas preguntas sobre **la actividad física y el tiempo de descanso de su hijo o hija**:

### Trayecto CASA - ESCUELA - CASA

**25. ¿Cómo va su hijo o hija a la escuela normalmente?** Por favor, seleccione la respuesta apropiada para cada concepto:

|                                             | Casa – Escuela        | Escuela – Casa        |
|---------------------------------------------|-----------------------|-----------------------|
| Caminando                                   | <input type="radio"/> | <input type="radio"/> |
| En transporte público (autobús, tren, etc.) | <input type="radio"/> | <input type="radio"/> |
| En coche o moto                             | <input type="radio"/> | <input type="radio"/> |
| En bicicleta                                | <input type="radio"/> | <input type="radio"/> |
| Otros                                       | <input type="radio"/> | <input type="radio"/> |

### ENTORNO

**26. ¿Qué zonas hay cerca de su casa para que su hijo o hija juegue?** Puede señalar más de una respuesta. Por favor, marque las opciones que correspondan:

- ☐ Nada  
☐ Parque infantil (columpios, etc.)  
☐ Espacio amplio (plaza, parque etc.), donde se puede ir en bicicleta, jugar a la pelota etc.  
☐ Pabellón o pista deportiva  
☐ Otro:

### DEPORTE Y JUEGO ACTIVO

**27. ¿Su hijo o hija participa en actividades deportivas con entrenador o monitor una vez terminadas las clases? (por ejemplo: natación, fútbol, danza, baloncesto, etc.).** Por favor, seleccione **sólo una** de las siguientes opciones:

- ☐ Sí  
☐ No

**28. En caso afirmativo, ¿En qué actividades deportivas con entrenador o monitor participa su hijo o hija, una vez terminadas las clases? (ejemplo: natación, fútbol, danza, etc.).** Por favor, marque las opciones que correspondan:

|              | Número de veces <u>por semana</u> | Número de horas <u>por actividad</u> |
|--------------|-----------------------------------|--------------------------------------|
| Atletismo    |                                   |                                      |
| Baloncesto   |                                   |                                      |
| Fútbol       |                                   |                                      |
| Balonmano    |                                   |                                      |
| Danza, baile |                                   |                                      |
| Judo         |                                   |                                      |
| Natación     |                                   |                                      |
| Rugby        |                                   |                                      |
| Tenis        |                                   |                                      |
| Vela         |                                   |                                      |
| Surf         |                                   |                                      |
| Voleibol     |                                   |                                      |
| Otros        |                                   |                                      |

**29. Durante la SEMANA PASADA, ¿Cuántos días su hijo o hija practicó otras actividades SIN entrenador o monitor, al menos una hora, en su tiempo libre? (por ejemplo: caminar rápido, ir en bicicleta, patinar, jugar en el parque, ir de excursión etc.)** Por favor, seleccione **sólo una** de las siguientes opciones:

- ☐ Ninguna vez
- ☐ 1 día
- ☐ 2 días
- ☐ 3 días
- ☐ 4 días
- ☐ 5 o más días

**30. ¿Normalmente salen en familia a hacer actividades como caminar, pasear, ir en bicicleta, ir al parque etc.?** Por favor, seleccione **sólo una** de las siguientes opciones:

- ☐ Sí
- ☐ No

**31. En caso afirmativo, ¿Cuántos días de la semana hacen deporte, montan en bicicleta, patinan o van a la montaña, en familia?** Por favor, seleccione **sólo una** de las siguientes opciones:

- ☐ 1 día
- ☐ 2 días
- ☐ 3 días
- ☐ 4 días
- ☐ 5 días
- ☐ 6 días
- ☐ 7 días

**32. En general, ¿Piensa que su hijo o hija hace suficiente actividad física?** Por favor, seleccione **sólo una** de las siguientes opciones:

- ☐ No, en absoluto
- ☐ No, probablemente no
- ☐ Sí, probablemente si
- ☐ Sí, seguro

**33. De media, ¿Cuánto tiempo PIENSA que tendría que practicar actividad física un niño o niña en edad escolar, ya sea jugando o haciendo deporte?** Por favor, seleccione **sólo una** de las siguientes opciones:

- ☐ Nada de actividad física. Menos de 1 h a la semana
- ☐ Poco tiempo. 1-2h a la semana
- ☐ Algún tiempo. 3-4 h a la semana
- ☐ Mucho tiempo. 5-6h a la semana

**34. En nuestros barrios y pueblos hay recursos o actividades que nos dan bienestar y facilitan realizar actividad física.** Indique un recurso de su barrio o pueblo que facilite realizar actividad física para su familia.

**35. ¿Para usted es importante que su hijo o hija haga actividades extraescolares?** Por favor, seleccione **sólo una** de las siguientes opciones:

- ☐ Sí
- ☐ No

**36. Numere por orden de importancia las siguientes actividades extraescolares según su criterio: "1" la que elige primero y "4" la que elige en último lugar.**

- ☐ Actividades como ludoteca, manualidades, cerámica, teatro, música, ajedrez etc.
- ☐ Actividades deportivas (fútbol, natación, danza, baloncesto etc.)
- ☐ Estudio de idiomas (inglés, francés, alemán, etc.)
- ☐ Repaso - estudio (academia, profesor de refuerzo en casa, etc.)

**37. ¿Cuántas horas al día dedica su hijo o hija a hacer los deberes?**

|                       | Lunes a jueves | Viernes a domingo y festivos |
|-----------------------|----------------|------------------------------|
| Ninguna               |                |                              |
| Hasta 30 min          |                |                              |
| Entre 30 min y 1 hora |                |                              |
| De 1 a 2 horas        |                |                              |
| Más de 2 horas        |                |                              |

**38. De LUNES A JUEVES, ¿Cuántas horas al día, su hijo o hija... Por favor, seleccione la respuesta apropiada para cada concepto:**

|                                                                                                | Nunca o casi nunca    | Algunas horas (Hasta 2 horas al día) | Muchas horas (Entre 2 y 4 horas al día) | Siempre o casi siempre (más de 4 horas al día) |
|------------------------------------------------------------------------------------------------|-----------------------|--------------------------------------|-----------------------------------------|------------------------------------------------|
| ¿Ve la televisión, DVD?                                                                        | <input type="radio"/> | <input type="radio"/>                | <input type="radio"/>                   | <input type="radio"/>                          |
| ¿Juega a videojuegos (Nintendo®, PlayStation®, Xbox®, Gameboy®, Nintendo DS®, etc.?)           | <input type="radio"/> | <input type="radio"/>                | <input type="radio"/>                   | <input type="radio"/>                          |
| ¿Está delante de un ordenador /móvil fuera del horario escolar (Internet, jugando, chateando?) | <input type="radio"/> | <input type="radio"/>                | <input type="radio"/>                   | <input type="radio"/>                          |

**39. De VIERNES A DOMINGO Y FESTIVOS, ¿Cuántas horas al día, su hijo o hija... Por favor, seleccione la respuesta apropiada para cada concepto:**

|                                                                                                | Nunca o casi nunca    | Algunas horas (Hasta 2 horas al día) | Muchas horas (Entre 2 y 4 horas al día) | Siempre o casi siempre (más de 4 horas al día) |
|------------------------------------------------------------------------------------------------|-----------------------|--------------------------------------|-----------------------------------------|------------------------------------------------|
| ¿Ve la televisión, DVD?                                                                        | <input type="radio"/> | <input type="radio"/>                | <input type="radio"/>                   | <input type="radio"/>                          |
| ¿Juega a videojuegos (Nintendo®, PlayStation®, Xbox®, Gameboy®, Nintendo DS®, etc.?)           | <input type="radio"/> | <input type="radio"/>                | <input type="radio"/>                   | <input type="radio"/>                          |
| ¿Está delante de un ordenador /móvil fuera del horario escolar (Internet, jugando, chateando?) | <input type="radio"/> | <input type="radio"/>                | <input type="radio"/>                   | <input type="radio"/>                          |

**HORAS DE SUEÑO****40. En las últimas 4 semanas, ¿Cuántas veces su HIJO o HIJA... Por favor, seleccione la respuesta apropiada para cada concepto:**

|                                                    | Nunca                 | Algún día             | Muchos días           | Todos los días        |
|----------------------------------------------------|-----------------------|-----------------------|-----------------------|-----------------------|
| ... ha tenido dificultad para dormirse?            | <input type="radio"/> | <input type="radio"/> | <input type="radio"/> | <input type="radio"/> |
| ... se ha despertado varias veces mientras dormía? | <input type="radio"/> | <input type="radio"/> | <input type="radio"/> | <input type="radio"/> |
| ... se ha despertado demasiado pronto?             | <input type="radio"/> | <input type="radio"/> | <input type="radio"/> | <input type="radio"/> |

**41. ¿A qué hora se va a dormir su hijo o hija de lunes a jueves?** **42. ¿A qué hora se va a dormir su hijo o hija de viernes a domingo y festivos?** **43. ¿A qué hora se levanta su hijo o hija de lunes a jueves?** **44. ¿A qué hora se levanta su hijo o hija de viernes a domingo y festivos?**

## Datos sociodemográficos

Para terminar, le pedimos algunos datos personales.

**45. ¿Cuántas personas viven en su casa?** Sólo se pueden introducir **números** en este campo. Por favor, escriba su respuesta:

Personas - número

**46. De ellos son:**

Niñas - número

Niños - número

Adultos - número

Mayores de 65 años - número

**47. Persona/s que contesta/n el cuestionario:**

|        |                      |               |                      |        |                      |               |                      |
|--------|----------------------|---------------|----------------------|--------|----------------------|---------------|----------------------|
| Mujer  | <input type="text"/> | Edad - número | <input type="text"/> | Mujer  | <input type="text"/> | Edad - número | <input type="text"/> |
| Mujer  | <input type="text"/> | Edad - número | <input type="text"/> | Mujer  | <input type="text"/> | Edad - número | <input type="text"/> |
| Hombre | <input type="text"/> | Edad - número | <input type="text"/> | Hombre | <input type="text"/> | Edad - número | <input type="text"/> |
| Hombre | <input type="text"/> | Edad - número | <input type="text"/> | Hombre | <input type="text"/> | Edad - número | <input type="text"/> |

**48. ¿Cuál es el lugar de nacimiento del padre y de la madre del niño o niña que participa en el proyecto?** Por favor, seleccione la respuesta apropiada para cada concepto:

|                                  | Padre                 | Madre                 |
|----------------------------------|-----------------------|-----------------------|
| Andalucía (España)               | <input type="radio"/> | <input type="radio"/> |
| Otra comunidad autónoma (España) | <input type="radio"/> | <input type="radio"/> |
| Argentina                        | <input type="radio"/> | <input type="radio"/> |
| Alemania                         | <input type="radio"/> | <input type="radio"/> |
| Bolivia                          | <input type="radio"/> | <input type="radio"/> |
| China                            | <input type="radio"/> | <input type="radio"/> |
| Colombia                         | <input type="radio"/> | <input type="radio"/> |
| Ecuador                          | <input type="radio"/> | <input type="radio"/> |
| Francia                          | <input type="radio"/> | <input type="radio"/> |
| Marruecos                        | <input type="radio"/> | <input type="radio"/> |
| Reino Unido                      | <input type="radio"/> | <input type="radio"/> |
| Rumanía                          | <input type="radio"/> | <input type="radio"/> |
| Rusia                            | <input type="radio"/> | <input type="radio"/> |
| Otro país Europa                 | <input type="radio"/> | <input type="radio"/> |
| Otro país América del Sur        | <input type="radio"/> | <input type="radio"/> |
| Otro país América del Norte      | <input type="radio"/> | <input type="radio"/> |
| Otro país Asia                   | <input type="radio"/> | <input type="radio"/> |
| Otro país África                 | <input type="radio"/> | <input type="radio"/> |

**49. Para los padres y /o madres que no nacieron en España. ¿Cuál es su tiempo de residencia aquí?** Por favor, seleccione la respuesta apropiada para cada concepto:

|                   | Padre                 | Madre                 |
|-------------------|-----------------------|-----------------------|
| Menos de 1 año    | <input type="radio"/> | <input type="radio"/> |
| Entre 1 y 5 años  | <input type="radio"/> | <input type="radio"/> |
| Entre 6 y 10 años | <input type="radio"/> | <input type="radio"/> |
| Más de 10 años    | <input type="radio"/> | <input type="radio"/> |

**50. ¿Cuál es el nivel más alto de estudios que han finalizado?** Por favor, seleccione la respuesta apropiada para cada concepto:

|                                                          | Padre                 | Madre                 |
|----------------------------------------------------------|-----------------------|-----------------------|
| No sabe leer o escribir                                  | <input type="radio"/> | <input type="radio"/> |
| No ha estudiado pero sabe leer y escribir                | <input type="radio"/> | <input type="radio"/> |
| Estudios primarios (hasta 5º EGB, ingreso)               | <input type="radio"/> | <input type="radio"/> |
| EGB completa (8º) o similar (bachiller elemental)        | <input type="radio"/> | <input type="radio"/> |
| ESO (Educación Secundaria Obligatoria)                   | <input type="radio"/> | <input type="radio"/> |
| Estudios de FPI                                          | <input type="radio"/> | <input type="radio"/> |
| Estudios de FP II                                        | <input type="radio"/> | <input type="radio"/> |
| Estudios Secundarios (BUP, B. Superior)                  | <input type="radio"/> | <input type="radio"/> |
| Estudios universitarios de grado medio (Diplomatura)     | <input type="radio"/> | <input type="radio"/> |
| Estudios universitarios de grado superior (Licenciatura) | <input type="radio"/> | <input type="radio"/> |
| Otros                                                    | <input type="radio"/> | <input type="radio"/> |

**51. ¿Cuál es su situación laboral actual?** Por favor, seleccione la respuesta apropiada para cada concepto:

|                                    | Padre                 | Madre                 |
|------------------------------------|-----------------------|-----------------------|
| Trabaja                            | <input type="radio"/> | <input type="radio"/> |
| Está en paro y ha trabajado antes  | <input type="radio"/> | <input type="radio"/> |
| Busca primer empleo                | <input type="radio"/> | <input type="radio"/> |
| Jubilado/a (trabajó anteriormente) | <input type="radio"/> | <input type="radio"/> |
| No trabaja fuera de casa           | <input type="radio"/> | <input type="radio"/> |
| Estudiante                         | <input type="radio"/> | <input type="radio"/> |
| Incapacidad/invalidez permanente   | <input type="radio"/> | <input type="radio"/> |
| Otros. Especificar                 | <input type="radio"/> | <input type="radio"/> |

**52. ¿Cuál es la ocupación que desempeña en la actualidad o la última que ha desempeñado?**

**53. ¿Cuál es su situación laboral actual, o en la última ocupación que ha desempeñado?**

|                                                          | Padre                 | Madre                 |
|----------------------------------------------------------|-----------------------|-----------------------|
| Trabajador/a por cuenta ajena                            | <input type="radio"/> | <input type="radio"/> |
| Trabajador/a por cuenta propia, autónomo/a               | <input type="radio"/> | <input type="radio"/> |
| Empresario/a o empleador/a de 10 o más asalariados/as    | <input type="radio"/> | <input type="radio"/> |
| Empresario/a o empleador/a de menos de 10 asalariados/as | <input type="radio"/> | <input type="radio"/> |
| Gerente de empresa de 10 o más asalariados/as            | <input type="radio"/> | <input type="radio"/> |
| Gerente de empresa de menos de 10 asalariados/as         | <input type="radio"/> | <input type="radio"/> |

**54. Con los ingresos de su hogar, ¿Cómo suele llegar usted o en su caso, usted y su familia en la actualidad a fin de mes?** Por favor, seleccione **sólo una** de las siguientes opciones:

- ☐ Con mucha dificultad  
☐ Con dificultad  
☐ Con cierta/alguna dificultad  
☐ Con cierta alguna facilidad  
☐ Con facilidad  
☐ Con mucha facilidad

**55. Por favor, indique el intervalo en el que están comprendidos los ingresos totales netos de su hogar, sumando todas las fuentes (si existe más de una) y deduciendo las retenciones a cuenta por impuestos, cotizaciones sociales y otros pagos asimilados.** Por favor, seleccione **sólo una** de las siguientes opciones:

- ☐ Hasta 300 €  
☐ De 301 € a 499 €  
☐ De 500 € a 999 €  
☐ De 1.000 € a 1.499 €  
☐ De 1.500 € a 1.999 €  
☐ De 2.000 € a 2.499 €  
☐ De 2.500 € a 2.999 €  
☐ De 3.000 € a 4.999 €  
☐ Más de 5.000 €  
☐ No sabe, no está seguro/a

**¡Muchas gracias por completar esta encuesta!**
