# Supplementary material for: A Multimodal Intervention for Prevention of Overweight and Obesity in Schoolchildren. A Protocol Study “PREVIENE-CÁDIZ”
Source: MDPI journal article supplement (doi:10.3390/ijerph18041622), 2021-02-08
Supplement: s1 [file s1]

## Cuestionario de Evaluación del Programa *PREVIENE CÁDIZ*.

### Docentes

Gracias por participar en este proyecto. Su opinión es muy importante.

Por favor cumplimente este formulario que nos permitirá evaluar el funcionamiento del Programa y mejorarlo con sus propuestas.

La duración prevista es de 15 minutos.

Hay 35 preguntas en la encuesta.

**Nombre del centro**

**Localidad**

Señale con una X la que corresponda.

**Línea**

|   |   |   |   |
|---|---|---|---|
| 1 | 2 | 3 | 4 |
|---|---|---|---|

**Persona que responde la encuesta:**

|                                |  |                |
|--------------------------------|--|----------------|
| Profesor/a tutor/a de la línea |  |                |
| Profesor/a de Educación Física |  |                |
| Otro/a:                        |  | Indicar quien: |

1. Indique la fecha aproximada en la que comenzó la primera actividad o primera sesión del programa PREVIENE (fecha en que comenzó el programa) \_\_\_\_ / \_\_\_\_ / \_\_\_\_

2. Indique la fecha aproximada en la que terminó la última actividad o última sesión del programa PREVIENE (fecha en que terminó el programa) \_\_\_\_ / \_\_\_\_ / \_\_\_\_

3. ¿Considera interesante incluir en el Programa *PREVIENE CÁDIZ* alguna otra actividad relacionada con los contenidos abordados?

Por favor seleccione **sólo una** de las siguientes opciones:

☐ Sí

☐ No

**Descríbala brevemente.**

(Sólo conteste esta pregunta si la respuesta fue "Sí" en la pregunta anterior).

Por favor, escriba su respuesta aquí:

**4. Señale si ha desarrollado el programa según la Guía Didáctica.**

Por favor, seleccione con una X la respuesta apropiada para cada concepto:

|            | Realizada según programa | No realizada          | Realizada de forma alternativa |
|------------|--------------------------|-----------------------|--------------------------------|
| Sesión 1   | <input type="radio"/>    | <input type="radio"/> | <input type="radio"/>          |
| Sesión 2   | <input type="radio"/>    | <input type="radio"/> | <input type="radio"/>          |
| Sesión 3   | <input type="radio"/>    | <input type="radio"/> | <input type="radio"/>          |
| Sesión 4   | <input type="radio"/>    | <input type="radio"/> | <input type="radio"/>          |
| Sesión 5   | <input type="radio"/>    | <input type="radio"/> | <input type="radio"/>          |
| Sesión 6   | <input type="radio"/>    | <input type="radio"/> | <input type="radio"/>          |
| Sesión 7   | <input type="radio"/>    | <input type="radio"/> | <input type="radio"/>          |
| Sesión 8   | <input type="radio"/>    | <input type="radio"/> | <input type="radio"/>          |
| Sesión 9   | <input type="radio"/>    | <input type="radio"/> | <input type="radio"/>          |
| Foto y Voz | <input type="radio"/>    | <input type="radio"/> | <input type="radio"/>          |

**5. En el caso de que en la pregunta 4 haya indicado que la sesión 1 la ha desarrollado de forma alternativa, indique las modificaciones realizadas (material de apoyo, técnicas empleadas, tiempo dedicado, etc.).**

Sesión 1. Por favor, escriba su respuesta aquí:

**6. En el caso de que en la pregunta 4 haya indicado que la sesión 2 la ha desarrollado de forma alternativa, indique las modificaciones realizadas (material de apoyo, técnicas empleadas, tiempo dedicado, etc.).**

Sesión 2. Por favor, escriba su respuesta aquí:

**7. En el caso de que en la pregunta 4 haya indicado que la sesión 3 la ha desarrollado de forma alternativa, indique las modificaciones realizadas (material de apoyo, técnicas empleadas, tiempo dedicado, etc.).**

Sesión 3. Por favor, escriba su respuesta aquí:

**8. En el caso de que en la pregunta 4 haya indicado que la sesión 4 la ha desarrollado de forma alternativa, indique las modificaciones realizadas (material de apoyo, técnicas empleadas, tiempo dedicado, etc.).**

Sesión 4. Por favor, escriba su respuesta aquí:

**9. En el caso de que en la pregunta 4 haya indicado que la sesión 5 la ha desarrollado de forma alternativa, indique las modificaciones realizadas (material de apoyo, técnicas empleadas, tiempo dedicado, etc.).**

Sesión 5. Por favor, escriba su respuesta aquí:

**10. En el caso de que en la pregunta 4 haya indicado que la sesión 6 la ha desarrollado de forma alternativa, indique las modificaciones realizadas (material de apoyo, técnicas empleadas, tiempo dedicado, etc.).**

Sesión 6. Por favor, escriba su respuesta aquí:

**11. En el caso de que en la pregunta 4 haya indicado que la sesión 7 la ha desarrollado de forma alternativa, indique las modificaciones realizadas (material de apoyo, técnicas empleadas, tiempo dedicado, etc.).**

Sesión 7. Por favor, escriba su respuesta aquí:

**12. En el caso de que en la pregunta 4 haya indicado que la sesión 8 la ha desarrollado de forma alternativa, indique las modificaciones realizadas (material de apoyo, técnicas empleadas, tiempo dedicado, etc.).**

Sesión 8. Por favor, escriba su respuesta aquí:

**13. En el caso de que en la pregunta 4 haya indicado que la sesión 9 la ha desarrollado de forma alternativa, indique las modificaciones realizadas (material de apoyo, técnicas empleadas, tiempo dedicado, etc.).**

Sesión 9. Por favor, escriba su respuesta aquí:

**14. En el caso de que en la pregunta 4 haya indicado que el Foto y Voz lo ha desarrollado de forma alternativa, indique las modificaciones realizadas (material de apoyo, técnicas empleadas, tiempo dedicado, etc.).**

Foto y Voz. Por favor, escriba su respuesta aquí:

**15. Valoración de las sesiones:**

Señale con una X aquellas contestaciones afirmativas (Sí).

|                                                 | Sesión 1                 | Sesión 2                 | Sesión 3                 | Sesión 4                 | Sesión 5                 | Sesión 6                 | Sesión 7                 | Sesión 8                 | Sesión 9                 | FotoVoz                  |
|-------------------------------------------------|--------------------------|--------------------------|--------------------------|--------------------------|--------------------------|--------------------------|--------------------------|--------------------------|--------------------------|--------------------------|
| La participación del alumnado fue buena         | <input type="checkbox"/> |
| Los contenidos fueron comprendidos              | <input type="checkbox"/> |
| Los materiales fueron usados satisfactoriamente | <input type="checkbox"/> |

**16. Valore la implicación de las familias con el desarrollo del programa.**

Valore con una escala del 1 al 5 la implicación de las familias en el programa, donde 1 significa que *no se han implicado nada* y 5 que *se han implicado mucho*.

Por favor seleccione **sólo una** de las siguientes opciones:

No se han implicado nada

☐ 1

☐ 2

☐ 3

☐ 4

☐ 5

Se han implicado mucho

**17. De los materiales del programa, indique cuáles ha usado.**

Por favor, seleccione con una X la respuesta apropiada para cada concepto:

|                                | Sí                    | No                    |
|--------------------------------|-----------------------|-----------------------|
| Guía didáctica del profesorado | <input type="radio"/> | <input type="radio"/> |
| Material alumnado              | <input type="radio"/> | <input type="radio"/> |
| Material familias              | <input type="radio"/> | <input type="radio"/> |

**18. Valore los siguientes aspectos de la Guía didáctica destinada al profesorado:**

Valore dichos aspectos con una escala del 1 al 5, donde 1 se corresponde con una puntuación muy baja y 5 con una puntuación muy alta.

|                                                                         | Sesión 1                 | Sesión 2                 | Sesión 3                 | Sesión 4                 | Sesión 5                 | Sesión 6                 | Sesión 7                 | Sesión 8                 | Sesión 9                 | Foto Voz*                |
|-------------------------------------------------------------------------|--------------------------|--------------------------|--------------------------|--------------------------|--------------------------|--------------------------|--------------------------|--------------------------|--------------------------|--------------------------|
| Claridad, comprensión y legibilidad del contenido por parte del docente | <input type="checkbox"/> |
| Idoneidad de la metodología propuesta                                   | <input type="checkbox"/> |
| Coherencia entre los objetivos, contenidos y actividades                | <input type="checkbox"/> |

|                                          | Sesión 1                 | Sesión 2                 | Sesión 3                 | Sesión 4                 | Sesión 5                 | Sesión 6                 | Sesión 7                 | Sesión 8                 | Sesión 9                 | Foto Voz*                |
|------------------------------------------|--------------------------|--------------------------|--------------------------|--------------------------|--------------------------|--------------------------|--------------------------|--------------------------|--------------------------|--------------------------|
| Calidad del diseño y las imágenes        | <input type="checkbox"/> |
| Ajuste de la sesión al tiempo programado | <input type="checkbox"/> |

\*Información aportada de manera complementaria a la Guía Didáctica

### 19. Valore los siguientes criterios del material para el alumnado.

Por favor, seleccione con una X la respuesta apropiada para cada concepto, donde 1 se corresponde con una puntuación muy baja y 5 con una puntuación muy alta.

|                                                            | 1                     | 2                     | 3                     | 4                     | 5                     |
|------------------------------------------------------------|-----------------------|-----------------------|-----------------------|-----------------------|-----------------------|
| Claridad, comprensión y legibilidad por parte del alumnado | <input type="radio"/> |
| Calidad del diseño y las imágenes                          | <input type="radio"/> |

### 20. Valore los siguientes criterios del material para las familias.

Por favor, seleccione con una X la respuesta apropiada para cada concepto, donde 1 se corresponde con una puntuación muy baja y 5 con una puntuación muy alta.

|                                                               | 1                     | 2                     | 3                     | 4                     | 5                     |
|---------------------------------------------------------------|-----------------------|-----------------------|-----------------------|-----------------------|-----------------------|
| Claridad, comprensión y legibilidad por parte de las familias | <input type="radio"/> |
| Calidad del diseño y las imágenes                             | <input type="radio"/> |

### 21. ¿Cree que el profesorado necesita más recursos para llevar a cabo el programa en las áreas que se especifican a continuación?

Por favor, marque las opciones que correspondan:

- ☐ Formación
- ☐ Materiales
- ☐ Apoyo de profesionales externos/as
- ☐ Tiempo para desarrollar las sesiones
- ☐ Otro:

### 22. Identifique las principales dificultades que ha encontrado para desarrollar las sesiones.

Por favor, marque las opciones que correspondan:

- ☐ Falta de tiempo para desarrollar la intervención completa (9 sesiones)
- ☐ El tiempo previsto para cada sesión no se ajusta a la duración de una clase
- ☐ Realización paralela de otros programas
- ☐ Algunos contenidos ya se han trabajado en otras materias
- ☐ Otro:

**23. ¿Volvería a participar en este programa el próximo curso escolar?**

Por favor, seleccione **sólo una** de las siguientes opciones:

☐ Sí

☐ No

**24. ¿Recomendaría este programa a otros/as docentes?**

Por favor, seleccione **sólo una** de las siguientes opciones:

☐ Sí

☐ No

**25. ¿Se han aplicado los recreos activos en su centro?**

Por favor, seleccione **sólo una** de las siguientes opciones:

☐ Sí

☐ No

**26. ¿En qué nivel se llegó a aplicar?**

**Sólo conteste esta pregunta si la respuesta fue 'Sí' en la pregunta 25.** Por favor, seleccione **sólo una** de las siguientes opciones:

☐ 1. El/la docente imprimió y colocó la hoja de control en un lugar visible y accesible al alumnado.

☐ 2. El maestro o maestra, además de lo anterior, controló que el alumnado anotase en la hoja de control cada día que realizaban actividad física durante el recreo.

☐ 3. El/la docente, además de lo anterior (1+2) informó al alumnado sobre lo que significa ser activo/a durante el recreo y les animó a participar.

☐ 4. El/la docente, además de todo lo anterior (1+2+3) hizo que el alumnado propusiese al menos tres actividades o juegos activos para realizar en los recreos.

☐ 5. El maestro o maestra, además de todo lo anterior (1+2+3+4), colocó en la pared de la clase un póster o cartel modelo con una frase y dibujo saludable.

**27. En caso de que el alumnado elaborase póster o carteles o alguna actividad, indíquela por favor.**

**Sólo conteste esta pregunta si la respuesta fue 'Sí' en la pregunta 25.** Por favor, marque las opciones que correspondan:

☐ Cada alumno/a realizó un póster o cartel en el aula o en casa con la familia, y lo mostró en clase.

☐ Se realizó un concurso con los posters o carteles realizados por el alumnado, eligiendo entre ellos/as los mejores.

☐ Se realizó un Collage saludable entre el alumnado, aportando cada uno/a una frase o un dibujo de contenido de salud.

☐ Se realizó algún tipo de representación (rap, teatro,...) de contenido saludable en grupos reducidos.

☐ Se realizó alguna actividad que logró implicar a todo el centro (profesorado y alumnado) (p.e. un Lipdub, Flashmob).

☐ Otra propuesta. Indíquela:

**28. Señale el motivo principal por el que no se llevaron a cabo los recreos activos.**

Sólo conteste esta pregunta si la respuesta fue 'No' en la pregunta 25. Por favor, seleccione **sólo una** de las siguientes opciones:

- ☐ No sabía cómo aplicar la propuesta de recreos activos.
- ☐ Creo que la propuesta de recreos activos no es eficaz.
- ☐ Considero que el alumnado ya es lo suficientemente activo durante los recreos.
- ☐ No estaba dispuesto/a a dedicar más tiempo al programa.
- ☐ Otro. Indíquelo:

**29 ¿Podría aportar alguna sugerencia que, desde su punto de vista, contribuyera a mejorar el programa?**

Por favor, escriba su respuesta aquí:



30. ¿Se ha desarrollado en tu centro este año el programa “Creciendo en salud”? Sí ☐ No ☐ No lo sé ☐

31. En caso negativo ¿nos podrías indicar cuales son las causas de no haberlo desarrollado?

32. En caso afirmativo, indicar qué líneas del mismo se han desarrollado: (en 3<sup>er</sup> curso)

|                                                                     |  |
|---------------------------------------------------------------------|--|
| Educación emocional.                                                |  |
| Estilos de vida Saludable.                                          |  |
| Autocuidados y Accidentalidad.                                      |  |
| Uso Positivo de las Tecnologías de la Información y la Comunicación |  |
| Prevención del Consumo de Sustancias Adictivas.                     |  |

33. En el caso de que se haya desarrollado alguna/s de las líneas anteriores, indicar qué bloques temáticos se han trabajado: (en 3<sup>er</sup> curso)

|                                                                     |  |
|---------------------------------------------------------------------|--|
| Educación emocional.                                                |  |
| - Conciencia Emocional.                                             |  |
| - Regulación Emocional.                                             |  |
| - Autonomía Emocional.                                              |  |
| - Competencia Social.                                               |  |
| - Competencias para la Vida y el Bienestar.                         |  |
| Estilos de vida Saludable.                                          |  |
| - Actividad Física.                                                 |  |
| - Alimentación Equilibrada.                                         |  |
| Autocuidados y Accidentalidad.                                      |  |
| - Autocuidados                                                      |  |
| - Accidentalidad:                                                   |  |
| o Educación Vial                                                    |  |
| o Seguridad en el Hogar                                             |  |
| Uso Positivo de las Tecnologías de la Información y la Comunicación |  |
| - Estilos de Vida Saludable en una Sociedad digital.                |  |
| - Adicciones a las TIC.                                             |  |
| - Buenas Prácticas y Recomendaciones.                               |  |
| Prevención del Consumo de Sustancias Adictivas.                     |  |
| - Hábitos que contribuyen a una vida sana.                          |  |
| - Consumo de Alcohol y Tabaco.                                      |  |
| - Publicidad y Drogas: mitos y creencias.                           |  |

34. ¿Disponéis en el Centro de un equipo de Promoción y Educación para la Salud? (Consejo de Salud Escolar o similar, grupo de personas encargados de estas actividades) Si ☐ No ☐

En caso afirmativo,

¿Quién lo ha coordinado? \_\_\_\_\_

¿Quién lo compone? (indicar las personas que lo componen, sus cargos y/o colectivos a los que representan, no es necesario indicar nombres y apellidos)

**35. Actividades realizadas este curso académico en el centro educativo con el alumnado de 3º curso, relacionadas con la alimentación y/o el ejercicio físico saludables, además de las incluidas en el programa PREVIENE.**

|                                                                                 |  |
|---------------------------------------------------------------------------------|--|
| Plan Escolar de Consumo de Frutas y Hortalizas (reparto de frutas / hortalizas) |  |
| Desayuno saludable.                                                             |  |
| Concurso de recetario infantil.                                                 |  |
| Huertos escolares.                                                              |  |
| Frutibus                                                                        |  |
| Otras:                                                                          |  |

**Indicar qué otras actividades se han realizado:**

**Muchas gracias por completar el cuestionario.**
