# Supplementary material for: A Multimodal Intervention for Prevention of Overweight and Obesity in Schoolchildren. A Protocol Study “PREVIENE-CÁDIZ”
Source: MDPI journal article supplement (doi:10.3390/ijerph18041622), 2021-02-08
Supplement: s1 [file s1]

**Cuestionario - Programa PREVIENE CÁDIZ.****Directores/as – Equipos directivos - Docentes**

Gracias por participar en este proyecto. Su opinión es muy importante.

Hay 6 preguntas en la encuesta.

**Nombre del centro**

**Localidad**

**Persona que responde la encuesta:**

|                                |  |                  |   |   |   |   |
|--------------------------------|--|------------------|---|---|---|---|
| Director/a del centro          |  |                  |   |   |   |   |
| Profesor/a de la línea         |  | Indicar la línea | 1 | 2 | 3 | 4 |
| Profesor/a de Educación Física |  |                  |   |   |   |   |
| Otra persona                   |  | Indicar quien:   |   |   |   |   |

1. ¿Se ha desarrollado en su centro este año el programa “Creciendo en salud”? Sí ☐ No ☐ No lo sé ☐

2. En caso negativo ¿nos podría indicar cuales son las causas de no haberlo desarrollado?

3. En caso afirmativo, indicar qué líneas del mismo se han desarrollado: **(en 3<sup>er</sup> curso)**

|                                                                     |  |
|---------------------------------------------------------------------|--|
| Educación emocional                                                 |  |
| Estilos de vida Saludable                                           |  |
| Autocuidados y Accidentalidad                                       |  |
| Uso Positivo de las Tecnologías de la Información y la Comunicación |  |
| Prevención del Consumo de Sustancias Adictivas                      |  |

4. En el caso de que se haya desarrollado alguna/s de las líneas anteriores, indicar qué bloques temáticos se han trabajado: **(en 3<sup>er</sup> curso)**

|                                             |  |
|---------------------------------------------|--|
| <b>Educación emocional.</b>                 |  |
| - Conciencia Emocional.                     |  |
| - Regulación Emocional.                     |  |
| - Autonomía Emocional.                      |  |
| - Competencia Social.                       |  |
| - Competencias para la Vida y el Bienestar. |  |
| <b>Estilos de vida Saludable.</b>           |  |
| - Actividad Física.                         |  |
| - Alimentación Equilibrada.                 |  |
| <b>Autocuidados y Accidentalidad.</b>       |  |
| - Autocuidados                              |  |
| - Accidentalidad:                           |  |
| o Educación Vial                            |  |
| o Seguridad en el Hogar                     |  |

| Uso Positivo de las Tecnologías de la Información y la Comunicación |  |
|---------------------------------------------------------------------|--|
| - Estilos de Vida Saludable en una Sociedad digital.                |  |
| - Adicciones a las TIC.                                             |  |
| - Buenas Prácticas y Recomendaciones.                               |  |
| Prevención del Consumo de Sustancias Adictivas.                     |  |
| - Hábitos que contribuyen a una vida sana.                          |  |
| - Consumo de Alcohol y Tabaco.                                      |  |
| - Publicidad y Drogas: mitos y creencias.                           |  |

**5. ¿Disponéis en el Centro de un equipo de Promoción y Educación para la Salud?** (Consejo de Salud Escolar o similar, grupo de personas encargados de estas actividades) Si ☐ No ☐

**En caso afirmativo,**

**¿Quién lo ha coordinado?** \_\_\_\_\_

**¿Quién lo compone?** (indicar las personas que lo componen, sus cargos y/o colectivos a los que representan, no es necesario indicar nombres y apellidos)

**6. Actividades realizadas este curso académico en el centro educativo con el alumnado de 3º curso, relacionadas con la alimentación y/o el ejercicio físico saludables.**

|                                                                                 |  |
|---------------------------------------------------------------------------------|--|
| Plan Escolar de Consumo de Frutas y Hortalizas (reparto de frutas / hortalizas) |  |
| Desayuno saludable.                                                             |  |
| Concurso de recetario infantil.                                                 |  |
| Huertos escolares.                                                              |  |
| Frutibus                                                                        |  |
| Otras:                                                                          |  |

**Indicar qué otras actividades se han realizado:**

**Muchas gracias por completar el cuestionario.**
