# Supplementary material for: A Multimodal Intervention for Prevention of Overweight and Obesity in Schoolchildren. A Protocol Study “PREVIENE-CÁDIZ”
Source: MDPI journal article supplement (doi:10.3390/ijerph18041622), 2021-02-08
Supplement: s1 [file s1]

## Como comemos

¡Hola!

Desde la **Universidad de Cádiz y la Escuela Andaluza de Salud Pública** estamos estudiando la **alimentación de los niños y las niñas de tu edad en la provincia de Cádiz**. Te vamos a preguntar sobre lo que comes, la actividad física que haces y cómo te sientes.

No se trata de un examen, no hay respuestas buenas ni malas. Sólo tienes que dar tu opinión y contestar sobre lo que haces. Como **es anónimo**, nadie va a saber cuáles son tus respuestas.

### ¿Qué tienes que hacer?

- ✓ Lee atentamente cada pregunta y preguntanos si no la entiendes bien.
- ✓ Responde la verdad, es importante.
- ✓ Si te equivocas puedes cambiar la respuesta. ¿Cómo? Táchala y marca la nueva.

Son 64 preguntas en esta encuesta.

**¡Muchas gracias por participar!**

**Código:** Antes de empezar, **por favor escribe el código que te han dado** para ésta encuesta. Recuerda que tendrás que utilizarlo otra vez, para la segunda parte.

Por favor, escribe aquí: **Código:**

## Datos personales

Para empezar, queremos saber algunas cosas sobre ti.

### 1. Por favor, elige el año en que naciste.

- ☐ 2008
- ☐ 2009
- ☐ 2010
- ☐ 2011

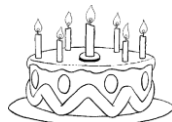

### 2. ¿Eres un chico o una chica?

- ☐ Chico
- ☐ Chica

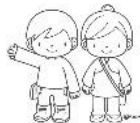

### 3. ¿Cuántas personas viven en tu casa? Incluyéndote a ti.

- ☐ 2
- ☐ 3
- ☐ 4
- ☐ 5
- ☐ 6
- ☐ 7
- ☐ 8
- ☐ 9
- ☐ 10
- ☐ Más de 10

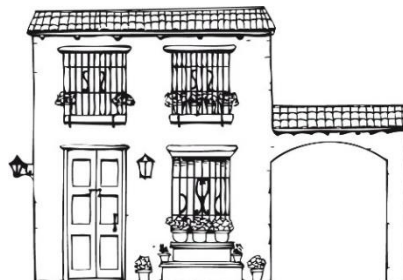

## Datos familiares

### 4. ¿Con quién vives en tu casa? Señala todas las personas que viven contigo.

Por favor, marque *las opciones* que correspondan:

- ☐ Madre
- ☐ Padre
- ☐ Pareja de la madre
- ☐ Pareja del padre
- ☐ Abuela
- ☐ Abuelo
- ☐ Hermano/s
- ☐ Hermana/s
- ☐ Familia de acogida
- ☐ Centro o residencia de acogida
- ☐ Otra/s persona/s:

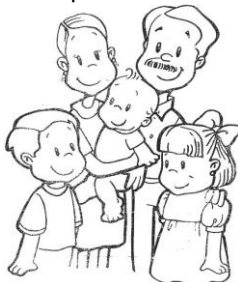

### 5. En tu casa, ¿Tienes un dormitorio solo para ti? Por favor, seleccione **sólo una** de las siguientes opciones:

- ☐ Sí
- ☐ No

### 6. ¿Cuántos ordenadores tenéis en tu familia? Por favor, seleccione **sólo una** de las siguientes opciones:

- ☐ Ninguno
- ☐ Uno
- ☐ Dos
- ☐ Más de dos

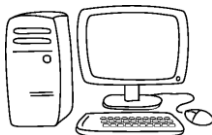

### 7. ¿Tiene tu familia coche propio o furgoneta? Por favor, seleccione **sólo una** de las siguientes opciones:

- ☐ No
- ☐ Sí, uno
- ☐ Sí, dos o más.

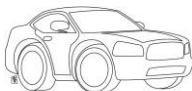

### 8. Durante los últimos 12 meses, ¿Cuántas veces saliste de vacaciones con tu familia?

Por favor, seleccione **sólo una** de las siguientes opciones:

- ☐ Nunca
- ☐ Una vez
- ☐ Dos veces
- ☐ Más de dos veces

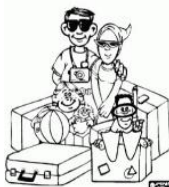

## Comidas diarias

Ahora te vamos a preguntar sobre lo que comes.

### 9. ¿Qué comidas haces todos los días? Por favor, marca *las opciones* que correspondan:

- ☐ Desayuno (antes de empezar las clases)
- ☐ Desayuno a media mañana. Recreo
- ☐ Comida del mediodía
- ☐ Merienda
- ☐ Cena
- ☐ Antes de acostarte

### 10. Cuando te saltas el desayuno, ¿Te cuesta atender en la clase? Por favor, marca **sólo una**:

- ☐ Sí
- ☐ No

**11. ¿Con quién sueles desayunar normalmente?** Por favor, marque *las opciones* que correspondan:

- ☐ Madre
- ☐ Pareja de la madre
- ☐ Padre
- ☐ Pareja del padre
- ☐ Hermanos/as
- ☐ Abuelo/a
- ☐ Compañeros de escuela o de comedor escolar
- ☐ Amigos
- ☐ Nadie
- ☐ Otro:

**12. ¿Con quién sueles comer a mediodía normalmente?** Por favor, marque *las opciones* que correspondan:

- ☐ Madre
- ☐ Pareja de la madre
- ☐ Padre
- ☐ Pareja del padre
- ☐ Hermanos/as
- ☐ Abuelo/a
- ☐ Compañeros de escuela o de comedor escolar
- ☐ Amigos
- ☐ Nadie
- ☐ Otro:

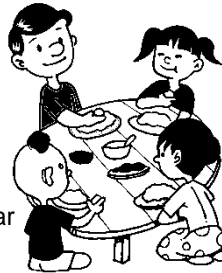

**13. ¿Con quién sueles merendar normalmente?** Por favor, marque *las opciones* que correspondan:

- ☐ Madre
- ☐ Pareja de la madre
- ☐ Padre
- ☐ Pareja del padre
- ☐ Hermanos/as
- ☐ Abuelo/a
- ☐ Compañeros de escuela o de comedor escolar
- ☐ Amigos
- ☐ Nadie
- ☐ Otro:

**14. ¿Con quién sueles cenar normalmente?** Por favor, marque *las opciones* que correspondan:

- ☐ Madre
- ☐ Pareja de la madre
- ☐ Padre
- ☐ Pareja del padre
- ☐ Hermanos/as
- ☐ Abuelo/a
- ☐ Compañeros de escuela o de comedor escolar
- ☐ Amigos
- ☐ Nadie
- ☐ Otro:

**15. ¿Cenas viendo la televisión o de una pantalla (móvil, ordenador, Nintendo®, PlayStation®, Xbox®, GameBoy®, etc.)?** Por favor, seleccione **sólo una** de las siguientes opciones:

- ☐ Siempre o casi siempre
- ☐ Muchas veces (3 o más veces a la semana)
- ☐ Pocas veces (menos de 3 veces a la semana)
- ☐ Nunca o casi nunca

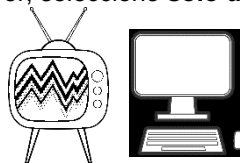

**16. ¿Sueles beber agua mientras comes y cenas?** Por favor, marca **sólo una** respuesta:

- ☐ Siempre o casi siempre
- ☐ Muchas veces (3 o más veces a la semana)
- ☐ Pocas veces (menos de 3 veces a la semana)
- ☐ Nunca o casi nunca

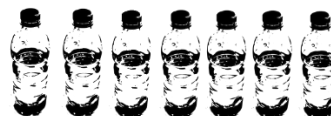

## Desayuno

**17. ¿Desayunas sentado o sentada en la mesa?** Por favor, marca sólo una respuesta:

- ☐ Siempre o casi siempre
- ☐ Muchas veces (3 o más veces a la semana)
- ☐ Pocas veces (menos de 3 veces a la semana)
- ☐ Nunca o casi nunca

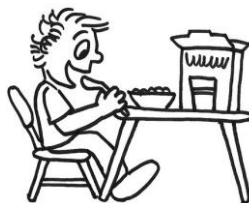

**18. Todos o casi todos los días, ¿Desayunas antes de ir a la escuela?** Por favor, marca sólo una respuesta:

- ☐ Sí
- ☐ No

**19. Señala todos los alimentos que sueles desayunar, aunque no comas todos cada día.**

Por favor, *marca las opciones* que correspondan:

- ☐ Leche sola
- ☐ Leche con cacao, descafeinado, café, batidos
- ☐ Yogur, yogur líquido, Actimel®
- ☐ Pan, bocadillo, tostada
- ☐ Pan de molde (Bimbo®, pan árabe, tortitas)
- ☐ Cereales de desayuno
- ☐ Bollería o Pastas (galletas, croissants, suizos, donuts®, magdalenas, ensaimadas)
- ☐ Fruta (manzana, pera, naranja, mandarina, plátano etc.)
- ☐ Zumo
- ☐ Refrescos (Coca-cola®, Fanta®, Seven Up®, Sunny Delight®, Nestea®, etc.)
- ☐ Otros alimentos, indica cuáles:

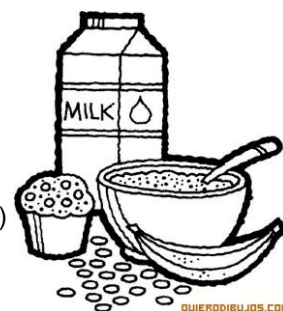

**20. ¿Qué alimentos sueles llevar para el recreo la mayoría de los días?** Por favor, marca *las opciones* que correspondan:

- ☐ Leche sola
- ☐ Leche con cacao, descafeinado, café, batidos
- ☐ Yogur, yogur líquido, Actimel®
- ☐ Pan, bocadillo, tostada
- ☐ Pan de molde (Bimbo®, pan árabe, tortitas)
- ☐ Cereales de desayuno
- ☐ Bollería o pastas (galletas, croissants, suizos, donuts®, magdalenas, ensaimadas)
- ☐ Fruta (manzana, pera, naranja, mandarina, plátano etc.)
- ☐ Zumo
- ☐ Refrescos (Coca-cola®, Fanta®, Seven Up®, Sunny Delight®, Nestea®, etc.)
- ☐ Otros alimentos, indica cuáles:

## Alimentos que comes y que te gustan

Ahora te vamos a preguntar por diferentes alimentos y te pedimos que nos digas *cuándo comes cada uno* y *si te gustan algunos de ellos*. No importa si no te acuerdas bien.

**21. ¿Cuándo comes pan (barra, tostada, bocadillo)?** Por favor, marca sólo **una** de las siguientes opciones:

- ☐ Todos los días
- ☐ Muchas veces (3 o 4 veces a la semana)
- ☐ Pocas veces (1 o 2 veces a la semana)
- ☐ Casi nunca (alguna vez al mes)
- ☐ Nunca

**22. ¿Cuándo comes pan de molde (pan Bimbo®, pan de pita, tortitas, picos etc.)?** Por favor, marca sólo **una** de las siguientes opciones:

- ☐ Todos los días
- ☐ Muchas veces (3 o 4 veces a la semana)
- ☐ Pocas veces (1 o 2 veces a la semana)
- ☐ Casi nunca (alguna vez al mes)
- ☐ Nunca

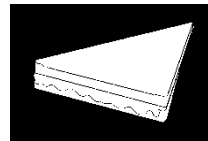

**23. ¿Cuándo comes cereales de desayuno?** Por favor, marca solo **una**:

- ☐ Todos los días
- ☐ Muchas veces (3 o 4 veces a la semana)
- ☐ Pocas veces (1 o 2 veces a la semana)
- ☐ Casi nunca (alguna vez al mes)
- ☐ Nunca

**24. ¿Cuándo comes patatas (sin contar las patatas de bolsa o fritas)?** Por favor, marca sólo **una**:

- ☐ Todos los días
- ☐ Muchas veces (3 o 4 veces a la semana)
- ☐ Pocas veces (1 o 2 veces a la semana)
- ☐ Casi nunca (alguna vez al mes)
- ☐ Nunca

**25. ¿Cuándo comes arroz o pasta (macarrones, espaguetis, fideos, cuscús, etc.)?**

Por favor, marca sólo **una**:

- ☐ Todos los días
- ☐ Muchas veces (3 o 4 veces a la semana)
- ☐ Pocas veces (1 o 2 veces a la semana)
- ☐ Casi nunca (alguna vez al mes)
- ☐ Nunca

**26. ¿Cuándo comes verduras crudas o ensalada (lechuga, tomate, zanahoria, pepino, etc.)?** Por favor, marca sólo **una**:

- ☐ Todos los días
- ☐ Muchas veces (3 o 4 veces a la semana)
- ☐ Pocas veces (1 o 2 veces a la semana)
- ☐ Casi nunca (alguna vez al mes)
- ☐ Nunca

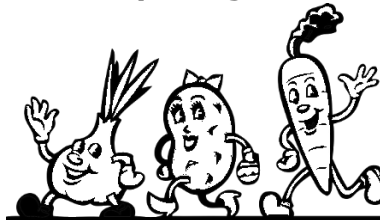

**27. ¿Cuántas veces al día comes verduras crudas o ensalada?** Por favor, marca sólo **una**:

- ☐ Una vez al día
- ☐ Dos veces al día
- ☐ Más de dos veces al día

**28. ¿Te gustan las verduras crudas o la ensalada (lechuga, tomate, zanahoria, pepino, etc.)?** Por favor, selecciona sólo **una** respuesta:

- ☐ Sí
- ☐ No

**29. ¿Cuándo comes verduras cocinadas (espinacas, berenjenas, calabacín, judías verdes, etc.)?** Por favor, marca sólo una:

- ☐ Todos los días
- ☐ Muchas veces (3 o 4 veces a la semana)
- ☐ Pocas veces (1 o 2 veces a la semana)
- ☐ Casi nunca (alguna vez al mes)
- ☐ Nunca

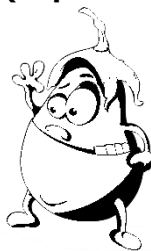

**30. ¿Cuántas veces al día comes verduras cocinadas?** Por favor, marca sólo una:

- ☐ Una vez al día
- ☐ Dos veces al día
- ☐ Más de dos veces al día

**31. ¿Te gustan algunas verduras cocinadas (espinacas, berenjena, calabacín, etc.)?**

Por favor marca sólo una:

- ☐ Si
- ☐ No

**32. ¿Cuándo comes fruta (manzana, pera, naranja, plátano, etc.)?** Por favor, marca sólo una:

- ☐ Todos los días
- ☐ Muchas veces (3 o 4 veces a la semana)
- ☐ Pocas veces (1 o 2 veces a la semana)
- ☐ Casi nunca (alguna vez al mes)
- ☐ Nunca

**33. ¿Cuántas veces al día comes fruta?** Por favor, marca sólo una:

- ☐ Una vez al día
- ☐ Dos veces al día
- ☐ Más de dos veces al día

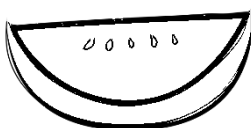

**34. ¿Te gusta la fruta?** Por favor, marca sólo una de las siguientes opciones:

- ☐ Si
- ☐ No

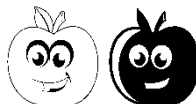

**35. ¿Cuándo bebes leche sola?** Selecciona una de las siguientes opciones:

- ☐ Todos los días
- ☐ Muchas veces (3 o 4 veces a la semana)
- ☐ Pocas veces (1 o 2 veces a la semana)
- ☐ Casi nunca (alguna vez al mes)
- ☐ Nunca

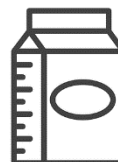

**36. ¿Cuándo bebes leche con cacao, batidos, descafeinado?** Por favor, marca sólo una:

- ☐ Todos los días
- ☐ Muchas veces (3 o 4 veces a la semana)
- ☐ Pocas veces (1 o 2 veces a la semana)
- ☐ Casi nunca (alguna vez al mes)
- ☐ Nunca

**37. ¿Cuándo comes yogurt, yogurt líquido o Actimel®?** Por favor, marca sólo una de las siguientes opciones:

- ☐ Todos los días
- ☐ Muchas veces (3 o 4 veces a la semana)
- ☐ Pocas veces (1 o 2 veces a la semana)
- ☐ Casi nunca (alguna vez al mes)
- ☐ Nunca

**38. ¿Cuándo comes queso?** Por favor, marca sólo una de las siguientes opciones:

- ☐ Todos los días
- ☐ Muchas veces (3 o 4 veces a la semana)
- ☐ Pocas veces (1 o 2 veces a la semana)
- ☐ Casi nunca (alguna vez al mes)
- ☐ Nunca

**39. ¿Cuándo comes pescado (merluza, sardinas, etc.)?** Por favor, marca sólo una:

- ☐ Todos los días
- ☐ Muchas veces (3 o 4 veces a la semana)
- ☐ Pocas veces (1 o 2 veces a la semana)
- ☐ Casi nunca (alguna vez al mes)
- ☐ Nunca

**40. ¿Cuándo comes carne roja (ternera, cerdo, cordero, hamburguesas...)?**

Por favor, marca sólo una respuesta:

- ☐ Todos los días
- ☐ Muchas veces (3 o 4 veces a la semana)
- ☐ Pocas veces (1 o 2 veces a la semana)
- ☐ Casi nunca (alguna vez al mes)
- ☐ Nunca

**41. ¿Cuándo comes carne blanca (pollo, pavo, conejo)?** Por favor, marca sólo una:

- ☐ Todos los días
- ☐ Muchas veces (3 o 4 veces a la semana)
- ☐ Pocas veces (1 o 2 veces a la semana)
- ☐ Casi nunca (alguna vez al mes)
- ☐ Nunca

**42. ¿Cuándo comes huevos?** Por favor, selecciona sólo una:

- ☐ Todos los días
- ☐ Muchas veces (3 o 4 veces a la semana)
- ☐ Pocas veces (1 o 2 veces a la semana)
- ☐ Casi nunca (alguna vez al mes)
- ☐ Nunca

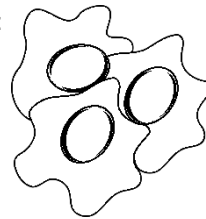

**43. ¿Cuándo comes legumbres (judías o alubias, garbanzos, lentejas, guisantes, habas)?**

Por favor, marca sólo una de las siguientes opciones:

- ☐ Todos los días
- ☐ Muchas veces (3 o 4 veces a la semana)
- ☐ Pocas veces (1 o 2 veces a la semana)
- ☐ Casi nunca (alguna vez al mes)
- ☐ Nunca

**44. ¿Cuándo comes frutos secos (almendras, avellanas, nueces, pistachos, cacahuètes, etc.)?**

Por favor, marca sólo una:

- ☐ Todos los días
- ☐ Muchas veces (3 o 4 veces a la semana)
- ☐ Pocas veces (1 o 2 veces a la semana)
- ☐ Casi nunca (alguna vez al mes)
- ☐ Nunca

**45. ¿Cuándo comes postres lácteos (flan, natillas, arroz con leche, helados, etc.)?**

Selecciona sólo una:

- ☐ Todos los días
- ☐ Muchas veces (3 o 4 veces a la semana)
- ☐ Pocas veces (1 o 2 veces a la semana)
- ☐ Casi nunca (alguna vez al mes)
- ☐ Nunca

**46. ¿Cuándo comes bollería o dulces (galletas, croissants, magdalenas, donuts ®)?**

Por favor, marca sólo **una**:

- ☐ Todos los días
- ☐ Muchas veces (3 o 4 veces a la semana)
- ☐ Pocas veces (1 o 2 veces a la semana)
- ☐ Casi nunca (alguna vez al mes)
- ☐ Nunca

**47. ¿Cuándo comes chucherías dulces (caramelos, chicles, gominolas, chocolatinas, etc.)?**

Por favor, marca sólo **una** de las siguientes opciones:

- ☐ Todos los días
- ☐ Muchas veces (3 o 4 veces a la semana)
- ☐ Pocas veces (1 o 2 veces a la semana)
- ☐ Casi nunca (alguna vez al mes)
- ☐ Nunca

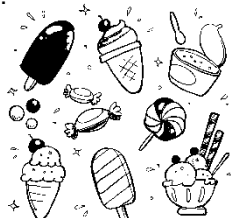

**48. ¿Cuándo comes patatas de bolsa, gusanitos, Doritos®, etc.?** Por favor, marca sólo **una**:

- ☐ Todos los días
- ☐ Muchas veces (3 o 4 veces a la semana)
- ☐ Pocas veces (1 o 2 veces a la semana)
- ☐ Casi nunca (alguna vez al mes)
- ☐ Nunca

**49. ¿Cuándo comes embutido (jamón serrano, salchichón, chorizo, salchicha, mortadela, beicon, etc.)?** Por favor, marca sólo **una** de las siguientes opciones:

- ☐ Todos los días
- ☐ Muchas veces (3 o 4 veces a la semana)
- ☐ Pocas veces (1 o 2 veces a la semana)
- ☐ Casi nunca (alguna vez al mes)
- ☐ Nunca

**50. ¿Cuándo bebes zumo de fruta envasado?** Por favor, selecciona sólo **una** de las siguientes opciones:

- ☐ Todos los días
- ☐ Muchas veces (3 o 4 veces a la semana)
- ☐ Pocas veces (1 o 2 veces a la semana)
- ☐ Casi nunca (alguna vez al mes)
- ☐ Nunca

**51. ¿Cuándo bebes refrescos (Fanta®, Sunny Delight®, Coca-Cola®, Nestea®, Aquarius®, Seven Up®)?** Por favor, marca sólo **una** de las siguientes opciones:

- ☐ Todos los días
- ☐ Muchas veces (3 o 4 veces a la semana)
- ☐ Pocas veces (1 o 2 veces a la semana)
- ☐ Casi nunca (alguna vez al mes)
- ☐ Nunca

## Comer fuera de casa

**52. Si comes en el comedor ¿Te acabas la comida que sirven en la escuela?** Por favor, marca sólo **una** de las siguientes opciones:

- ☐ Siempre
- ☐ Muchas veces
- ☐ Pocas veces
- ☐ Nunca

**53. Si comes en el comedor, ¿Te gusta la comida que sirven en la escuela?** Por favor, seleccione sólo **una** de las siguientes opciones:

- ☐ Si
- ☐ No



**54. ¿Cuántas veces vas a un establecimiento de comida rápida? (McDonalds®, Burger King®, Kentucky®, Telepizza®, Doner Kebab, Frankfurt, etc.).** Por favor, marca sólo una de las siguientes opciones:

- ☐ Todos los días
- ☐ Muchas veces (3 o más veces a la semana)
- ☐ Pocas veces (menos de 3 veces a la semana)
- ☐ Nunca

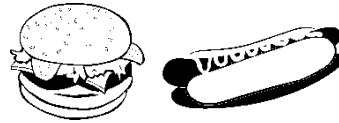

**55. ¿Cuántas veces vas a comer a un restaurante? No tengas en cuenta los establecimientos de comida rápida de la pregunta anterior.** Elige una respuesta.

- ☐ Todos los días
- ☐ Muchas veces (3 o más veces a la semana)
- ☐ Pocas veces (menos de 3 veces a la semana)
- ☐ Nunca

**56. ¿Te gusta probar nuevos alimentos?** Por favor, seleccione sólo una de las siguientes opciones:

- ☐ Sí
- ☐ No

## ¿Qué piensas sobre los alimentos?

Las preguntas que hacemos ahora *son sobre lo que sientes y piensas*, aunque no sea lo que haces siempre.

**57. De todos estos grupos de alimentos, ¿De cuáles deberías comer MÁS raciones cada día?**

Por favor, selecciona sólo una de las siguientes opciones:

- ☐ Pan, cereales, arroz, pasta
- ☐ Productos lácteos (leche, yogur, queso)
- ☐ Bollería (galletas, croissants, etc.), Golosinas
- ☐ Fruta
- ☐ Carne, pescado, huevos, frutos secos
- ☐ Verduras
- ☐ No lo sé

**58. De todos estos grupos de alimentos, ¿De cuáles deberías comer MENOS raciones cada día?** Marca sólo una:

- ☐ Pan, cereales, arroz, pasta
- ☐ Productos lácteos (leche, yogur, queso)
- ☐ Bollería (galletas, croissants, etc.), Golosinas
- ☐ Fruta
- ☐ Carne, pescado, huevos, frutos secos
- ☐ Verduras
- ☐ No lo sé

**59. ¿Cuántas veces al día deberías comer fruta y verduras?** Por favor, marca sólo una:

- ☐ Ninguna vez
- ☐ 1 vez
- ☐ 2 veces
- ☐ 3 veces
- ☐ 4 veces
- ☐ 5 veces
- ☐ No lo sé

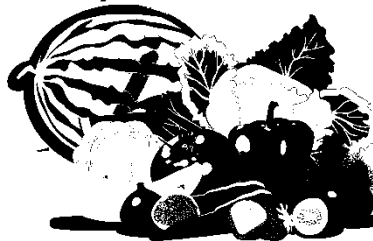

**60. Lo que comes ¿Puede hacer que tengas una enfermedad cuando seas mayor? (del corazón, cáncer, etc.)** Por favor, marca sólo una:

- ☐ Sí
- ☐ No
- ☐ No lo sé

**61. La gente que pesa más de lo que debería ¿Puede tener más problemas de salud que otras personas?** Por favor, marca sólo una:

- ☐ Sí
- ☐ No
- ☐ No lo sé

## ¿Qué opinas sobre la comida?

**62. ¿Piensas que los alimentos que comes son buenos para tu salud?** Por favor, marca sólo una:

- ☐ Todos
- ☐ Muchos
- ☐ Pocos
- ☐ Ninguno

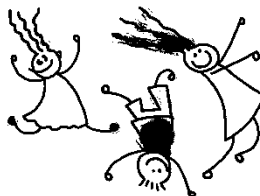

**63. En nuestros barrios y pueblos hay recursos o actividades que nos dan bienestar y facilitan mantener una alimentación saludable.**

Indica un recurso de tu barrio o pueblo que facilita mantener una alimentación saludable.

## Situaciones especiales

**64. Si tu alimentación es distinta a la de tus compañeros y compañeras por alguna de éstas razones, márcalas por favor. Puedes elegir varias:**

- ☐ Soy vegetariano (no como carne ni pescado)
- ☐ No como carne de cerdo
- ☐ Tengo alergia al gluten (no puedo comer pan o pasta)
- ☐ Soy intolerante a la lactosa (no puedo beber leche)
- ☐ Tengo alergia a los frutos secos
- ☐ Otras. ¿Cuáles?:

**¡Ya has terminado!**

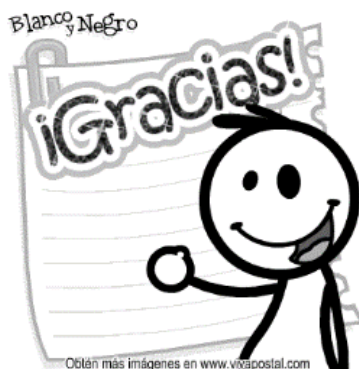

**¡Saludos y gracias por completar esta encuesta!**
